**Cholesterol binding to the transmembrane region of a group 2 HA of  
Influenza virus is essential for virus replication affecting both virus  
assembly and HA's fusion activity**

**Bodan Hu<sup>a</sup>, Chris Tina Höfer<sup>a</sup>, Christoph Thiele<sup>b</sup>, Michael Veit<sup>a</sup> #**

<sup>a</sup> Institut für Virologie, Freie Universität Berlin, Berlin, Germany.

<sup>b</sup> Biochemistry and Cell Biology of Lipids, Life & Medical Sciences Institute  
(LIMES), University of Bonn, Germany

Running head: Cholesterol binding to HA

#Address correspondence to Michael Veit: [mveit@zedat.fu-berlin.de](mailto:mveit@zedat.fu-berlin.de)

Word count for the abstract: 248

Word count for the text: 9476

Keywords: Influenza virus; Hemagglutinin; transmembrane region; cholesterol;  
virus assembly; membrane fusion

## ABSTRACT

1 Hemagglutinin (HA) of Influenza virus is incorporated into cholesterol enriched,  
2 nanodomains of the plasma membrane. Phylogenetic group 2 HAs contain the  
3 conserved cholesterol consensus motif (CCM) YKLW in the transmembrane region.  
4 We previously reported that mutations in the CCM retarded intracellular transport of  
5 HA and decreased its nanodomain association. Here we analyzed whether cholesterol  
6 interacts with the CCM. Incorporation of photocholesterol into HA was significantly  
7 reduced if the whole CCM is replaced by alanine, both using immunoprecipitated HA  
8 and when HA is embedded in the membrane. Next, we used reverse genetics to  
9 investigate the significance of the CCM for virus replication. No virus was rescued if  
10 the whole motif is exchanged (YKLW4A); single (LA) or double (YK2A and LW2A)  
11 mutated virus showed decreased titers and a comparative fitness disadvantage. In  
12 polarized cells transport of HA mutants to the apical membrane was not disturbed.  
13 Reduced amounts of HA and cholesterol were incorporated into the viral membrane.  
14 Mutant viruses exhibit a decrease in hemolysis, which is only partially corrected if the  
15 membrane is replenished with cholesterol. More specifically, viruses have a defect in  
16 hemifusion as demonstrated by fluorescence dequenching. Cells expressing  
17 HA-YKLW4A fuse with erythrocytes, but the number of events are reduced. Even  
18 after acidification unfused erythrocytes remain cell-bound, a phenomenon not  
19 observed with wildtype HA. We conclude that cholesterol-binding to a group 2 HA is  
20 essential for virus replication. It has pleiotropic effects on virus assembly and  
21 membrane fusion, mainly on lipid mixing and possibly a preceding step.

22 **IMPORTANCE**

23 The glycoprotein hemagglutinin (HA) is a major pathogenicity factor of Influenza  
24 viruses. Whereas the structure and function of HA's ectodomain is known in great  
25 detail, similar data for the membrane-anchoring part of the protein are missing. Here  
26 we demonstrate that the transmembrane region of a group 2 HA interacts with  
27 cholesterol, the major lipid of the plasma membrane and the defining element of the  
28 viral budding site nanodomains of the plasma membrane. The cholesterol binding  
29 motif is essential for virus replication. Its partial removal affects various steps of the  
30 viral life cycle, such as assembly of new virus particles and their subsequent cell entry  
31 via membrane fusion. A cholesterol-binding pocket in group 2 HAs might be a  
32 promising target for a small lipophilic drug that inactivates the virus.

### 33 INTRODUCTION

34 Hemagglutinin (HA) of Influenza virus is a typical type I transmembrane glycoprotein  
35 with an N-terminal signal peptide, a large ectodomain, a single transmembrane region  
36 and a short cytoplasmic tail (1). HA assembles into homotrimers in the ER and is  
37 transported via the secretory pathway to the plasma membrane, in polarized cells to  
38 the apical membrane, where virus assembly and budding take place (2). It was  
39 proposed that Influenza virus assembles in and buds through small dynamic,  
40 cholesterol- and sphingolipid-enriched nanodomains of the plasma membrane which  
41 could coalesce to larger, more stable platforms (3, 4). Indeed, it was demonstrated by  
42 quantitative mass spectrometry that these lipids are enriched in the viral membrane  
43 relative to the entire apical membrane of their host cell (5). HA organizes the viral  
44 assembly site, since it is not randomly distributed in the plasma membrane of  
45 transfected cells, but is present in (partly cholesterol-sensitive) clusters of various  
46 sizes as demonstrated by quantitative immunoelectron microscopy (6-8) and FPALM  
47 (fluorescence-photoactivation-localization microscopy) (9). The other integral  
48 membrane proteins of the virus, the neuraminidase (NA) and the ion channel M2  
49 contain their own signals for targeting to the viral assembly site (10), where they are  
50 supposed to recruit the internal components of viral particles, the matrix protein M1  
51 and the eight ribonucleoparticles (containing the viral genome segments complexed to  
52 the nucleoprotein (NP) and the three polymerase proteins PA, PB1 and PB2) into  
53 budding virions (11, 12).

54 HA plays also a pivotal role during virus entry. It is responsible for receptor  
55 recognition: A binding pocket in the globular head domain of the molecule recognizes  
56 sialic acid moieties in glycoproteins and glycolipids on the host cell surface. After  
57 clathrin-mediated endocytosis of the virus acidification of the endosome triggers an  
58 irreversible conformational change in HA (1). In order to perform the conformational  
59 change the inactive precursor HA0 must first be processed into two disulfide-linked  
60 subunits, the membrane-embedded HA2 and the globular HA1 subunit, by a protease  
61 provided by the host organism (13). The elucidation of the crystal structures of the  
62 ectodomain of HA at neutral and a part of the ectodomain at mildly acidic pH has led  
63 to a model of how conformational changes of HA execute membrane fusion. The  
64 hydrophobic fusion peptide at the N-terminus of HA2, which is buried inside the  
65 trimeric structure at neutral pH, becomes exposed on the distal end of the molecule  
66 after acidification and interacts with the cellular membrane. A second conformational  
67 change then bends the HA-molecule thereby drawing the fusion peptide towards the  
68 transmembrane region which leads to close apposition of both lipid bilayers (1). By  
69 mechanisms that are not well understood at present lipid exchange initially only  
70 occurs between the outer leaflets of the viral and the cellular membrane (hemifusion).  
71 Finally, a fusion pore opens, flickers and dilates thereby allowing entry of the viral  
72 genome into the target cell (14). Analysing the fusion kinetics of individual virus  
73 particles indicated that exposure of the fusion peptide is the rate-limiting step of the  
74 reaction. Full fusion then requires the cooperative action of three to four neighbouring  
75 HA trimers that pull together on the cellular membrane to execute fusion (15).

76 The C-terminal membrane anchoring fragment of HA, for which no structure has been  
77 elucidated, also contributes to membrane fusion. Fusion pore formation requires the  
78 presence of a transmembrane region with a minimal length of 17 amino acids (16);  
79 HA anchored to the outer leaflet of the membrane by a glycolipid instead of the TMR  
80 may cause hemifusion after acidification, but is not able to catalyze full fusion (17).  
81 The cytoplasmic tail plays a role during fusion pore formation; it requires S-acylation  
82 at conserved cysteine residues at least in some HA subtypes (18), whereas other  
83 (artificial) modifications of the tail negatively affect fusion (19, 20).  
84 The lipids in the membrane destined to fuse are also not passive bystanders of the  
85 reaction. Since fusion requires strong bending of the bilayer, certain lipid species with  
86 an intrinsic curvature, i.e. those having a small head group and a large tail (or *vice*  
87 *versa*) positively or negatively affect certain stages of the reaction (21). One abundant  
88 lipid species with a negative intrinsic curvature is cholesterol, since it consists of a  
89 small hydrophilic head group, a large and rigid steroid ring structure and a flexible  
90 hydrocarbon tail and thus it may stabilize highly curved fusion intermediates. Indeed,  
91 cholesterol addition or removal from the HA-containing membrane positively or  
92 negatively affects the extent of fusion (22, 23). Cholesterol acts at two stages in  
93 membrane fusion: at an early, lipidic stage prior to fusion pore opening and a later  
94 stage during fusion pore expansion (22). However, the mechanism of the effect of  
95 cholesterol on fusion is not understood and is probably more complex than stabilizing  
96 highly curved lipid intermediates. Cholesterol prevents unphysiological (“leaky”)  
97 fusion reactions (24), affects membrane ordering (and hence the lateral mobility of

98 HA), the spatial distance of HA in virus particles (25) and finally allows liquid phase  
99 separation that concentrates HA for efficient fusion (26).

100 Hemagglutinin has two signals for targeting to cholesterol-enriched nanodomains. On  
101 one hand, three conserved S-acylated cysteines located at the cytoplasmic end of the  
102 TMR and in the cytoplasmic domain, respectively (27-29), on the other hand,  
103 hydrophobic amino acids in the TMR facing the outer leaflet of the plasma  
104 membrane, especially the conserved amino acids VIL at the beginning of the TMR.  
105 The latter were identified by alanine scanning mutagenesis throughout the whole  
106 TMR of HA to identify residues that confer incorporation of HA into  
107 detergent-resistant-membranes (DRMs), the biochemical correlate of membrane  
108 nanodomains (26, 30). Mutation of these amino acids at the beginning of the TMR  
109 also reduced fluorescence resonance energy transfer (FRET) of HA with a  
110 double-acylated raft-marker (27, 29, 31).

111 We reported recently that leucine of VIL might be part of a cholesterol consensus  
112 motif (CCM) that is known to bind cholesterol to 7-transmembrane-receptors  
113 (7TMR). By crystallography the cholesterol-interacting amino acids in the human  
114  $\beta$ -adrenergic receptor were identified and by sequence comparison with other 7TMR  
115 the cholesterol consensus motif (CCM) was defined (32). In the CCM the amino acids  
116 interacting with cholesterol are not a linear sequence motif, but distributed between  
117 two transmembrane helices of these polytopic membrane proteins. One helix contains  
118 the sequence motif W/Y-I/V/L-K/R, whereby all residues must face the same side of  
119 the helix. In addition, another aromatic amino acid, either phenylalanine (F) or

120 tyrosine (Y) is needed on a second helix to bind cholesterol from the other side. Since  
121 cholesterol is present in both leaflets of a bilayer (33), the CCM can be orientated in  
122 two ways; the charged amino acid might face either the extracellular space or the  
123 cytosolic compartment (34-36).

124 HAs of the phylogenetic group 2 contain a strictly conserved YKLW motif which  
125 conforms to the CCM defined for 7TMR (F/Y-R/K-I/V/L-Y/W). Mutations in the  
126 CCM drastically retard Golgi-localized processing of HA, such as acquisition of  
127 Endo-H resistant carbohydrates in the medial-Golgi and proteolytic cleavage in the  
128 TGN. All mutants analysed by FRET also showed reduced association with  
129 nanodomains at the plasma membrane (37).

130 Here we analysed whether the CCM indeed interacts with cholesterol and if mutations  
131 in the CCM affect virus replication, virus assembly and membrane fusion.



## 132 MATERIAL AND METHODS

### 133 Cell culture and virus experiments

134 Madin Darby canine kidney (MDCK II), Chinese hamster ovary (CHO) and human  
135 embryonic kidney 293T cells were grown in DMEM (Dulbecco's modification of  
136 Eagle's medium, PAN, Aidenbach, Germany) supplemented with 10% FCS (fetal calf  
137 serum, Perbio, Bonn, Germany) and penicillin/streptomycin (100 units/ml and 100  
138  $\mu\text{g/ml}$ , respectively) at 37 °C and 5% CO<sub>2</sub>. To generate polarized cells, 5x10<sup>5</sup> MDCK  
139 II cells were seeded into 24 mm transwells containing a polyester membrane with  
140 pores having a diameter of 0.4  $\mu\text{m}$  (Corning) using 1.5 ml growth medium in the  
141 upper and 2.6 ml in the lower chamber. Medium was exchanged every day and cells  
142 were cultured for 4 days.

143 Mutant 1 of the highly pathogenic strain A/FPV/Rostock/1934 (H7N1), termed FPV\*,  
144 that contains the sequence PSKGR instead of PSKKRKKR at the C-terminus of HA1  
145 (38) was used to create recombinant virus. FPV\* shows low pathogenicity in chicken  
146 and requires trypsin for growth in cell culture and is thus suitable for working in a  
147 BSL2 lab. The full-length sequence (excluding the fluorophore) of HA mutants LA,  
148 YK2A, LW2A and YKLW4A were cloned from plasmid pECerulean (37) to pHH21  
149 with In-Fusion® HD Cloning Kit (Takara Bio, Japan). Recombinant Influenza viruses  
150 were produced with the twelve plasmids system (38) by transfection (0.5  $\mu\text{g}$  of each  
151 plasmid) of 293T cells in 35 mm dishes with TurboFect reagent. 4-6 h later, the  
152 medium was changed to infection medium (DMEM, 0.1% FCS, 0.2% BSA, 1  $\mu\text{g/ml}$   
153 TPCK-Trypsin). 48 h post transfection, the supernatant was harvested and centrifuged

154 at 2000 g for 5 min to clear from cell debris and further amplified in MDCK II cells to  
155 generate a virus stock.

156 HA tests were performed in 96 well U-bottom microwell plates. 50 µl of a two-fold  
157 serial dilution of virus sample in PBS was incubated with 50 µl 1% chicken red blood  
158 cells for 30 minutes at room temperature.

159 For TCID<sub>50</sub> tests virus samples were three-fold serially diluted in infection medium.  
160 100 µl diluted virus samples (8 replicates) were added to confluent MDCK II cells in  
161 96-well plates after washing the cells once with DPBS+ (Dulbecco's  
162 phosphate-buffered saline with Calcium and Magnesium, PAN biotech, Germany). 2  
163 days post infection, cells were washed once with PBS, fixed with 3% formaldehyde in  
164 PBS for 5 min and stained with 0.1% crystal violet. The TCID<sub>50</sub> titer was calculated  
165 by Reed & Muench Method.

166 To generate a growth curve, 90% confluent MDCK II cells in 6-well plates were  
167 infected with FPV\*-wt or mutants with a moi of 0.0005 (based on TCID<sub>50</sub> titer). 1 h  
168 post infection, medium was replaced by infection medium, aliquots of culture  
169 supernatant were harvested at 12 h, 24 h, 36 h and 48 h post infection, cleared from  
170 cell debris (2000 g, 5 min) and titrated by TCID<sub>50</sub> and HA-assay.

171 For competitive growth experiments FPV\* mutant was mixed with wild type at a ratio  
172 of 5 to 1 and MDCK II cells were infected with total moi of 0.0005. vRNA was  
173 extracted from the virus mixture or at 24 h and 48 h post infection from the cell  
174 culture supernatant with RTP® DNA/RNA Virus Mini Kit (Strattec, Germany).

175 OneStep RT-PCR Kit (Qiagen) was used for reverse transcription of HA fragment

176 with specific primers (Forward: TGAAAATGGTTGGGAAGGTCTGG, Reverse:  
177 CGCATGTTTCCGTTCTTCACAC), which were then sent for sequencing.

178 For growth experiments in polarized MDCK II cells, they were infected with viruses  
179 through the upper chamber at an m.o.i. of 0.001. After binding for 1 h, the culture  
180 medium in the upper chamber was changed to infection medium. The culture medium  
181 from upper and lower chamber was harvested separately at 8 h, 24 h, 34 h and 48 h  
182 post infection and virus titer was determined by HA-assay.

183

#### 184 **Photocholesterol crosslinking of HA**

185 Two different experiments, labeling of HA-expressing cells or immunoprecipitated  
186 HA, were performed to investigate whether HA-wt and HA with mutations in the  
187 CCM interact with click-photocholesterol (6,6'-Azi-25-ethinyl -27-norcholestan-3 $\beta$ -ol,  
188 see supplementary file 1 for synthesis of the compound). For the first experiment,  
189 CHO cells in 6-well plates were transfected with HA-wt, HA-LA, HA-YK2A,  
190 HA-LW2A or HA-YKLW4A cloned into the vector pCAGGS. 4-6 h post transfection,  
191 5  $\mu$ l photocholesterol (from 5 mg/ml stock in ethanol, final concentration is 50  $\mu$ M)  
192 was added to 1ml of medium without serum and cells were incubated overnight. 24  
193 hours after transfection cells were put on ice and exposed to UV light (wavelength  
194 320–365 nm, power 8W, 3.5 A, 60V) for 10 minutes to activate the diazirine group.  
195 Cells were then lysed in 500  $\mu$ l 1% NP40 in IP buffer (500 mM Tris-HCl, 20 mM  
196 EDTA, 30 mM sodium pyrophosphate decahydrate, 10 mM sodium fluoride, 1 mM  
197 sodium orthovanadate, 2 mM benzamidine, 1 mM PMSF, 1 mM NEM and protease

198 inhibitor cocktail (Sigma)). 450  $\mu$ l (=90%) of the cell lysate was incubated with  
199 anti-HA2 antiserum (1:1000) at 4°C with agitation overnight. 50  $\mu$ l of  
200 protein-A-sepharose was added to the mixture and incubated at 4°C for another 4h  
201 prior to pelleting and washing with IP-buffer (2x) and with PBS.

202 For cholesterol crosslinking of purified protein, HA was first immunoprecipitated  
203 from transfected CHO cells, 0.5  $\mu$ l photocholesterol was added to immunoprecipitated  
204 HA (in 100  $\mu$ l PBS) and the mixture was illuminated with UV light at 4°C for 10  
205 minutes.

206 HA-photocholesterol complexes were then clicked to Pico-azido picolyl sulfo cy3 by  
207 using the CuAAC Biomolecule Reaction Buffer Kit (Jena Bioscience). Samples were  
208 subjected to SDS-PAGE and HA-photocholesterol was visualized using the Typhoon  
209 FLA 9500 scanner (Excitation =555 nm; Emission =565 nm) in the native (unfixed)  
210 gel. In both experiments 50  $\mu$ l (10%) of cell lysate was removed for western blotting  
211 to compare HA-wt and HA-YKLW4A expression levels. The density of HA bands of  
212 the western-blot and the fluorogram were analyzed with Image J software. The  
213 photo-crosslinking (fluorogram) to protein expression (western-blot) ratios were  
214 calculated for each mutant and experiment and results were normalized to HA  
215 wild-type = 100%. Results are show as mean plus/minus standard deviation.

216

### 217 **SDS-PAGE, Western-blot and HA2 antiserum**

218 After sodium dodecyl sulfate-polyacrylamide gel electrophoresis (SDS-PAGE) using  
219 12% polyacrylamide, gels were blotted onto polyvinylidene difluoride (PVDF)

220 membrane (GE Healthcare). After blocking of membranes (blocking solution: 5%  
221 skim milk powder in PBS with 0.1% Tween-20 (PBST)) for 1h at room temperature,  
222 anti HA2 antibodies (diluted 1:2000 in blocking solution) were applied overnight at  
223 4°C. After washing (3x10 min with PBST), horseradish peroxidase-coupled  
224 secondary antibody (anti-rabbit, Sigma-Aldrich, Taufkirchen, Germany, 1:5000) was  
225 applied for 1 hour at room temperature. After washing, signals were detected by  
226 chemiluminescence using the ECLplus reagent (Pierce/Thermo, Bonn, Germany) and  
227 a Fusion SL camera system (Peqlab, Erlangen, Germany). The density of bands was  
228 analyzed with Image J software.

229 Antisera against the HA2 subunit of FPV were generated in rabbits. Purified virus was  
230 subjected to SDS-PAGE and the Coomassie-stained HA2 band was cut from the gel  
231 and used for immunization.

232

### 233 **Determination of the cholesterol concentration**

234 Cholesterol concentration in purified virus was determined using Amplex™ Red  
235 Cholesterol Assay Kit (Molecular Probes, Thermo Fisher) according to  
236 manufacturer's instruction. Briefly, virus preparations (5 µl) purified from MDCK II  
237 cells with a 20-60% sucrose gradient were lysed in 1X reaction buffer (0.1 M  
238 potassium phosphate, pH 7.4, 50 mM NaCl, 5 mM cholic acid, 0.1% Triton X-100)  
239 and incubated with working solution (300 µM Amplex Red reagent, 2 U/mL  
240 Horseradish peroxidase, 2 U/ml cholesterol oxidase in 1X reaction buffer) at 37°C for  
241 30 min in the dark. Cholesterol oxidase produces H<sub>2</sub>O<sub>2</sub> that in the presence of

242 horseradish peroxidase (HRP) reacts with the Amplex Red reagent in a 1:1  
243 stoichiometry to produce highly fluorescent resorufin. Its fluorescence was measured  
244 using a microplate reader with an excitation wavelength of 555 nm and emission at  
245 590 nm. We measured only cholesterol, not cholesterol esters, since virus samples  
246 were not treated with cholesterol esterase.

247 The protein concentration of the same virus preparations was measured with  
248 Roti-Quant universal kit (Carl Roth), which is based on the bicinchoninic acid (BCA)  
249 assay, except that PCA, a highly similar, but brighter molecule was used.

250

### 251 **Confocal microscopy**

252 To study apical transport of HA with single or double mutations in the CCM (LA,  
253 YK2A and LW2A), polarized cells were infected with the respective viruses at an  
254 m.o.i of 1. Cells were fixed with 4% formaldehyde in PBS at 6 h post infection for 20  
255 min and blocked with 3% BSA in PBS. Anti-HA2 antiserum (1:500) and monoclonal  
256 antibody against the basolateral marker  $\beta$ -catenin (1:500) was then incubated with  
257 cells, followed by anti-rabbit secondary antibody coupled to Alexa Fluor 568 (red)  
258 and anti-mouse Alexa Fluor 488 (green), respectively, both at a dilution of 1:1000.

259 To study the apical transport of the HA mutant YKLW4A,  $5 \times 10^5$  MDCK II cells were  
260 seeded into 24 mm transwells one day before transfection using Lipofectamine 3000  
261 Reagent (Invitrogen). 6 h post transfection, the upper chamber was changed to fresh  
262 DMEM supplemented with 2% FCS. The cells were cultured for 4 more days with  
263 changing medium every day. Cells were fixed with 4% formaldehyde in PBS for 20

264 min and permeabilized with 0.5% Triton X-100 for 5 min, followed by staining with  
265 primary antibody and secondary antibody as described above.

266 Cells were visualized with the VisiScope confocal FRAP System (VisiTron Systems  
267 GmbH), equipped with iXon Ultra 888 EMCCD camera, using 100X objective (1.45  
268 NA) and illuminated via laser lines at 488 nm (Alex Fluor 488) and 561 nm (Alexa  
269 Fluor 568). Polarized cells were recorded in z-stacks with 0.5  $\mu\text{m}$  increments and  
270 analyzed with Image J software.

271

## 272 **Membrane fusion assays**

### 273 *Hemolysis assay with virus particles*

274 Culture supernatants of virus-infected MDCK II cells were cleared by low-speed  
275 centrifugation (2000 x g, 5 min) and were then adjusted with infection medium to a  
276 HA titer of  $2^6$ . 100  $\mu\text{l}$  virus was added to 96-well plates with round bottom, mixed  
277 with 100  $\mu\text{l}$  2% chicken red blood cells (RBCs) in PBS and incubated at 4°C for 30  
278 min. To pellet RBCs with bound virus samples were centrifuged at 250xg for 1 min.  
279 After removal of supernatant, the virus-RBC sediment was resuspended in 100  $\mu\text{l}$   
280 citric acid buffer (20 mM citric acid, 150 mM NaCl) adjusted with HCl to various  
281 mildly acidic pH values and incubated at 37°C for 1 h (or different time points  
282 between 0.5 and 4 h) to allow fusion between virus and RBCs. Then the plate was  
283 centrifuged at 250 g for 1 min and 50  $\mu\text{l}$  of the supernatant was removed to determine  
284 the hemoglobin released from RBCs at a wavelength of 405 nm using a microplate  
285 reader.

286 To increase the cholesterol content in the viral membrane prior to hemolysis, 6  $\mu$ l  
287 cholesterol stock (10 mM in chloroform: methanol (1:1; v:v)) was dried under  
288 nitrogen and resuspended in 150  $\mu$ l methyl- $\beta$ -cyclodextrin (M $\beta$ CD) solution (2 mM in  
289 aqua dest) which gives a molar ratio of 1:5 (0.4 mM/2mM). The mixture was shaken  
290 at 37°C overnight to load M $\beta$ CD with cholesterol. Viruses grown in MDCK II cells  
291 were pelleted through a 20% sucrose cushion, resuspended in 1X TNE buffer (10 mM  
292 Tris, 100 mM NaCl und 1 mM EDTA, pH 7.4) and adjusted to the same HA titer. 100  
293  $\mu$ l virus was incubated with 100  $\mu$ l cholesterol-M $\beta$ CD complex at room temperature  
294 for 30 min, centrifuged at 100000 g for 20 min to pellet the virus, which was then  
295 resuspended in 1xTNE buffer. 10  $\mu$ l virus with an HA titer of  $2^8$  loaded or not loaded  
296 with cholesterol was used for hemolysis assay.

297 *R18 fluorescence dequenching assay with virus particles*

298 Culture supernatants of virus-infected MDCK II cells were cleared by low-speed  
299 centrifugation (2000 x g, 5 min). Viruses were pelleted (100000 x g, 2 h) through a 20%  
300 sucrose cushion, resuspended in 1X TNE buffer (10 mM Tris, 100 mM NaCl, 1 mM  
301 EDTA, pH 7.4) and adjusted to a HA titer of  $2^{10}$ . For octadecyl rhodamine B chloride  
302 (R18) labeling, 50  $\mu$ l virus was mixed with 0.5  $\mu$ l 2 mM R18 (20  $\mu$ M final  
303 concentration) and incubated on ice for 30 min in the dark. To remove unincorporated  
304 R18 samples were centrifuged at 100000 xg for 15 min at 4°C, labeled viruses were  
305 resuspended in 50  $\mu$ l PBS and either used immediately or stored at -80°C.

306 To prepare erythrocyte ghosts, human RBCs were washed three times with PBS, lysed  
307 in ice-cold hypotonic buffer (4.7 mM Na<sub>2</sub>HPO<sub>4</sub>, 1.1 mM NaH<sub>2</sub>PO<sub>4</sub>, 1 mM EDTA,



308 pH7.4) and again washed with PBS. For the fusion assay, 10  $\mu$ l R18 labeled virus was  
309 incubated with 40  $\mu$ l erythrocyte ghosts (1 mg/ml) at 4°C for 20 min. The virus-ghost  
310 mixture was then added to 1.96 ml prewarmed fusion buffer (150 mM NaCl, 10 mM  
311 Na-acetate x 3 H<sub>2</sub>O, pH 7.4) in a cuvette with a magnetic stir bar. Fluorescence  
312 intensity (Excitation: 560 nm, Emission: 590 nm) was recorded at 37°C using the  
313 Cary Eclipse fluorescence spectrophotometer (Agilent Technologies). 100 s later  
314 when the fluorescence is steady, 7  $\mu$ l citric acid (250 mM) was added to lower the pH  
315 to 5. 10 min after adding citric acid, 50  $\mu$ l Triton X-100 (1% in aqua dest.) was added  
316 to the solution to achieve maximal dequenching. The fusion efficiency was calculated  
317 by the formula  $FDQ=100 \times (F(t)-F(0))/(F(\max)-F(0))$ , with F(0) as the fluorescence  
318 intensity before adding citric acid, F(max) as the maximal dequenching intensity after  
319 adding Triton X-100 and F(t) as the fluorescence intensity at each time point. The  
320 equation used for curve fitting is  $f(x) = a * [1 - e^{(-kx)}]$

#### 321 *Double-labelled erythrocyte fusion assay with expressed HA*

322 Human RBCs (1% in PBS) were double labeled with the lipidic dye R18 and the  
323 content marker calcein-AM (Molecular Probes, Life technologies). 20  $\mu$ l of R18 (1  
324 mg/ml in ethanol) was added to 1% RBC and incubated for 30min at room  
325 temperature in the dark. Samples were then washed twice with PBS and resuspended  
326 in 2 ml PBS. Calcein-AM (50  $\mu$ g freshly dissolved in 10  $\mu$ l DMSO + 40  $\mu$ l PBS) was  
327 added to the mixture and incubated for 45 min at 37°C in the dark. The labelled RBCs  
328 were then washed with PBS five times and resuspended in 5 ml DPBS+. CHO cells in  
329 6-well plate were transfected with HA-wt or HA-YKLW4A cloned into the pCAGGS

330 vector. 24 h post transfection, cells were treated with 500  $\mu$ l trypsin (5  $\mu$ g/ml) plus  
331 neuraminidase (from *Clostridium perfringens*, 0.22 mg/ml, Sigma) in DPBS+ for 5  
332 min at room temperature. The reaction was stopped by adding medium and cells were  
333 washed twice with DPBS+. 1 ml double-labeled RBCs were then added to  
334 HA-expressing cells and incubated at room temperature in the dark with gentle  
335 shaking. Unbound RBCs were removed by washing twice with DPBS+. DPBS+  
336 adjusted with HCl to pH 5 was added to cells and incubated for 5min at 37°C. Acidic  
337 DPBS+ was replaced by DPBS+ adjusted to neutral pH and after incubation for 10  
338 min cells were observed in an inverted fluorescence microscope (Zeiss, calcein  
339 channel: Excitation: band pass filter 470/540, Emission: BP 525/50; R18 channel:  
340 Excitation = BP 572/625 Emission =BP 629/662).

341 **RESULTS**

342 **Mutation in the CCM decrease cross linking of HA to photocholesterol**

343 The ectodomain of HA is connected by a nine amino acid long and flexible linker  
344 (that contains the cleavage sites for proteases used to remove the ectodomain from  
345 virus particles (39-41)) to the 26 amino acid long,  $\alpha$ -helical transmembrane region  
346 (TMR) (42-44) and the eleven amino acid long cytoplasmic tail carrying three fatty  
347 acids attached to conserved cysteine residues (28, 45). Only HAs of the phylogenetic  
348 group 2 contain a CCM motif, comprising the conserved amino acids YK at the end of  
349 the linker and LW at the beginning of the TMR (Fig. 1A). A helical wheel plot  
350 revealed that the amino acids K, L and W are located on one, but Y on the other side  
351 of a helix suggesting that two helices of the trimeric HA molecule must contribute to  
352 binding of one cholesterol molecule (Fig. 1B). This distribution is thus similar to the  
353 amino acids that interact with cholesterol in 7TMR receptors, where the residues  
354 W/Y-I/V/L-K/R are on one helix, but another aromatic amino acid, either  
355 phenylalanine (F) or tyrosine (Y) on a second helix that bind cholesterol from the  
356 other side (32, 35, 36). The cholesterol binding site in the  $\beta$ 2-adrenergic receptor is  
357 located in the internal part of the transmembrane region and is completely embedded  
358 within the membrane (32), but other 7TMR receptors bind cholesterol to the outer part  
359 of the TMR or to amino acids that do not correspond to the CCM motif (35).

360 In our previous studies we reported that various mutations in the CCM severely retard  
361 transport of HA to the plasma membrane (31, 37), but whether the CCM interacts with  
362 cholesterol was not investigated. We performed experiments with a

363 clickable-photocholesterol that contains a diazirine group at position 6 of the sterol  
364 ring (Fig. 2A). This moiety disintegrates upon uv-illumination into molecular nitrogen  
365 plus a highly reactive carbene-group that forms a covalent bond with amino acid side  
366 chains in close vicinity. To visualize cross-linked proteins, click-photocholesterol  
367 contains a terminal alkyne group at the end of the side chain which can be “clicked” in  
368 a copper-catalyzed reaction under physiological conditions to the azido-fluorophore  
369 Cy3. A similar, but tritiated compound was used to demonstrate cholesterol-binding to  
370 synaptophysin (46) and another study showed that this photocholesterol is a faithful  
371 mimetic of authentic cholesterol (47). It is also more similar to genuine cholesterol  
372 than other photocholesterol probes used recently since it contains (besides the alkyne  
373 group) no further alterations in cholesterol’s alkyl side chain (48). However, some of  
374 the diazirine groups might be photoactivated to other reactive species that have a  
375 longer half time than the carbene-group. They might then be cross-linked  
376 unspecifically to any proteins they encounter during diffusion through the membrane.  
377 Thus, photocrosslinking is a qualitative rather than a quantitative measure of the  
378 cholesterol affinity of a protein. Nevertheless, all available compounds label only a  
379 few specific proteins out of all cellular membrane proteins (46, 48) indicating that  
380 they are suitable tools to identify proteins that strongly (but non-covalently) interact  
381 with cholesterol.

382 We expressed H7 subtype HA from a variant of fowl plague virus (FPV\*) having a  
383 monobasic cleavage site, both the wild-type protein and a mutant where the four  
384 amino acids forming the CCM were replaced by alanine (HA YKLW4A). In the first

385 experiments transfected CHO cells were labeled with click-photocholesterol for 16  
386 hours and subsequently uv-irradiated for 10 minutes. Cells were then lysed, one  
387 aliquot was subjected to western-blotting with HA2 specific antibodies, the other  
388 aliquot to immunoprecipitation using the same antibodies and click-chemistry. The  
389 resulting fluorescence scan showed incorporation of photocholesterol into both HA wt  
390 and HA YKLW4A in approximately similar amounts (Fig. 2C). However, the western  
391 blot revealed that the expression level of HA YKLW4A is significantly higher (Fig.  
392 2B). Quantification of fluorescence intensities and normalizing them to the expression  
393 level showed that incorporation of photocholesterol into HA YKLW4A was reduced to  
394 58% ( $\pm 13\%$ , mean of six transfections, Fig. 2D).

395 Since mutations in the CCM decrease association of HA with nanodomains (27, 37)  
396 one might argue that the diminished labeling of HA YKLW4A might be due to its  
397 compartmentalization into cholesterol-depleted membrane domains. Consequently,  
398 less cholesterol (and hence photocholesterol) is present in the vicinity of HA  
399 YKLW4A and thus available to label the protein by random interactions. To exclude  
400 such an unspecific effect, we first immunoprecipitated HA wt and HA YKLW4A from  
401 cell lysates and then performed photo-crosslinking and click-chemistry on the purified  
402 HA-antibody complex (Fig. 2E+F). Nevertheless, a similar result was obtained;  
403 incorporation of photocholesterol into HA YKLW4A was even more reduced relative  
404 to HA wt ( $38 \pm 5\%$ , mean of four transfections, Fig. 2G).

405 To determine whether partial exchange of the CCM has an effect on  
406 photo-crosslinking we created HA double mutants HA LW2A and HA YK2A where

407 two consecutive amino acids located at the end of the TMR and in the linker region,  
408 respectively were exchanged by alanine. In HA LA the leucine in the TMR (which of  
409 all single mutants had the strongest effect on intracellular transport of HA (37)) was  
410 substituted by alanine. Cells expressing the three HA mutants were labeled and  
411 analyzed as before but no significant reduction of incorporation of photocholesterol  
412 was detected (Fig. 2H-J). Thus, in order to reduce photo-crosslinking of HA the whole  
413 CCM must be exchanged suggesting that the residues act synergistically with  
414 cholesterol.

415

#### 416 **Mutations in the CCM of HA affect virus replication**

417 All our previous experiments about the CCM of HA were performed with expressed  
418 protein (37). To investigate whether cholesterol binding to HA affects virus replication,  
419 we created the described mutations in the CCM of HA in the context of the viral  
420 genome. We used a variant of fowl plague virus (A/FPV/Rostock/34, H7N1), termed  
421 FPV\* which contains a monobasic cleavage site in HA and thus requires trypsin for  
422 growth in cell culture (38). The amino acid exchanges were generated by at least three  
423 nucleotide substitutions to exclude that mutant viruses revert back to wild type.

424 The mutant HA plasmid together with plasmids encoding the other viral proteins were  
425 transfected into HEK 293T cells, the supernatant was used to infect MDCK II cells  
426 and release of virus particles was assessed by HA assays. In three independent  
427 transfections we never rescued virus particles for FPV\* YKLW4A, whereas wild-type  
428 virus and the other three mutants done in parallel exhibit HA titers of  $2^5$  - $2^6$ . From the

429 rescued mutants a virus stock was generated in MDCK II cells and sequencing of the  
430 HA gene showed that the desired mutations were still present (data not shown).

431 To compare the replication kinetics of the viruses, MDCK II cells were infected with  
432 FPV\* wt or with the mutants at an m.o.i. of 0.0005 (based on TCID<sub>50</sub> titer),  
433 supernatants were collected at various time points post infection and virus titers were  
434 assessed by HA and TCID<sub>50</sub>-assay (Fig. 3A+B). The growth curve revealed a  
435 statistically significant decrease in the TCID<sub>50</sub> titer for FPV\* LW2A (1.5 logs, ~95%  
436 reduction, mean of 3 experiments) at 36 and 48 hours post infection. Titers of FPV\*  
437 YK2A and FPV\* LA were also somewhat decreased relative to FPV\* wt.

438 We next asked whether mutating the CCM of HA might reduce the competitive fitness  
439 of the virus. To test this, we mixed FPV\* YK2A or FPV\* LW2A with FPV\* wt at a  
440 ratio of 5:1, co-infected MDCK II cells (total moi of 0.0005), extracted viral RNA  
441 from cellular supernatants, either before or at 24 and 48 hours after infection,  
442 amplified the relevant part of the HA gene with rtPCR and analyzed it by sequencing.

443 Fig. 3C shows the sequencing chromatograms for the region of interest in the HA  
444 gene. Both wild-type and mutant viruses were detected at all time points, reflected by  
445 superimposed peaks for the respective nucleotide bases at the mutation site. Due to  
446 the higher number of infectious mutant viruses in the inoculum the mutant sequence is  
447 predominant before infection, but particles released from cells after 24 and 48 hours  
448 contain mainly the wild type sequence. Although the differences in the peak heights in  
449 the chromatograms should not be interpreted in a precise quantitative manner, it is  
450 obvious that the wild type virus rapidly outgrows mutant virus with two exchanges in

451 the CCM within a few replication cycles.

452 In sum, we conclude that the CCM is essential for virus replication. Exchanging all  
453 four amino acids of the motif prevented generation of infectious virions and  
454 exchanging two of them reduced virus titers and their competitive fitness.

455

#### 456 **Mutations in the CCM do not cause mistargeting of HA in polarized cells**

457 In polarized MDCK cells HA is transported to the apical membrane, the viral budding  
458 site (49). Since signals for transport are located in the TMR of HA (50-52) we  
459 analyzed whether mutations in the CCM disturbed polarized budding of virus particles.  
460 MDCK cells grown on transwell filters were infected with FPV\* wt and FPV\* mutant  
461 virus at low moi, aliquots of the supernatant were removed from the apical and  
462 basolateral chamber at various time points and virus titers were determined using  
463 HA-assays. The growth curve plotted for virus particles released from the apical  
464 membrane shows again a reduction in virus titers for all FPV\* mutants, statistically  
465 significant for FPV\* LW2A. However, no virus was released for any of the mutants  
466 from the basolateral membrane (Fig. 4A). Since Influenza virus might bud from the  
467 apical membrane even if HA is redirected to the basolateral membrane (53) we also  
468 determined the localization of HA LA, HA LW2A and HA YK2A in virus-infected  
469 and of HA YKLW4A in transfected cells using confocal microscopy. However, wt HA  
470 and all mutants are exclusively located at the apical membrane, the fluorescence  
471 derived from anti-HA antibodies does not overlap with the fluorescence emitted by  
472 the basolateral membrane marker (Fig. 4B+C). We conclude that mutations in the



473 CCM do not affect targeting of HA to the apical membrane.

474

475 **Mutations in the CCM reduce incorporation of HA and cholesterol into virions**

476 In principle, the decrease in virus replication could be due to compromised cell entry  
477 of mutant virus and/or a defect in virus assembly and budding. We have previously  
478 shown that mutations in the CCM decreases HA's cell surface exposure and  
479 association with membrane rafts in transfected cells (37). Since these defects might  
480 affect incorporation of HA into budding virions we purified FPV\* wt and FPV\*  
481 LW2A virus particles with sucrose gradient centrifugation from embryonated eggs  
482 and analyzed their protein composition by SDS-PAGE and Coomassie staining (Fig.  
483 5A). Densitometry of viral protein bands and calculation of the viral protein ratios  
484 (Fig. 5B) revealed for FPV\* LW2A reduced amounts of HA relative to NP (85%,  
485 normalized to FPV\* wt) and to M1 (82%). If virus particles were purified from  
486 MDCK II cells (Fig. 5C), the reduction in HA incorporation was even more  
487 pronounced; the HA/M1 ratio is reduced to 59% and the HA/NP ratio to 68%.  
488 Likewise, the other two mutants also exhibit a (albeit less distinct, 82-90%) reduction  
489 in the HA content (Fig. 5D).

490 Since mutations in the CCM reduce association of HA with membrane nanodomains  
491 (27, 37) and since FPV wt buds through cholesterol-enriched domains (5) we asked  
492 whether FPV\* mutants possess less cholesterol in their membrane. We therefore  
493 determined the cholesterol concentration of the same three virus preparations from  
494 MDCK II cells and divided it by the protein concentration. For FPV\* wt we

495 determined a mean of 220 nM cholesterol per ng/ $\mu$ l total protein, but considerable  
496 variations between individual preparations was observed. Nevertheless, the  
497 cholesterol content of each FPV\* mutant was lower in every (except one) virus  
498 preparation relative to FPV\* wt, which was purified from sister cultures in parallel.  
499 The only exception was FPV\* LA for which a slightly higher amount of cholesterol  
500 was determined in one, but not in the other two preparations (see Fig. 6A for details  
501 on individual experiments).

502 Normalizing the cholesterol content for each virus preparation (wt =100%) exhibit a  
503 reduction to 89% in FPV\* LA, to 88% in FPV LW2A and to 82% in FPV YK2A (Fig.  
504 6B). Assuming that our FPV\* wt preparations contain 52 mol% of cholesterol in  
505 relation to all other envelope lipids as determined by quantitative mass spectrometry  
506 for FPV particles grown in the same cell type (5), one can calculate that the  
507 cholesterol content in mutant particles is reduced to 46% in FPV\* LA and FPV\*  
508 LW2A and to 43% in FPV\* YK2A. This corresponds quite exactly to the cholesterol  
509 content (45%) determined for the apical membrane of polarized MDCK II cells (5).  
510 Thus, our results are consistent with the concept that viruses with mutations in the  
511 CCM bud not through (cholesterol-enriched) membrane nanodomains but through the  
512 bulk phase of the plasma membrane (26).

513 Influenza A virus mutants with defects in virus assembly and budding release particles  
514 with aberrant morphology (54). We therefore investigated the virus preparations also  
515 by negative stain electron microscopy, but no differences in the morphology or size of  
516 intact virus particles were obvious (data not shown). Whether, the lower cholesterol

517 content affects the density of HA spikes in virus particles requires investigations with  
518 more sophisticated methods (25).

519

### 520 **Mutations in the CCM decrease the hemolytic activity of HA**

521 Next, we investigated whether mutations in the CCM affect cell entry of viruses via  
522 HA-mediated membrane fusion. Since the extent of membrane fusion increases with  
523 the HA-concentration and since the HA amount is reduced in mutant virus  
524 preparations (Fig. 5A-D) we first used hemolysis assays. This allows adjusting the  
525 amount of virus by means of its HA-titer and to record membrane fusion  
526 quantitatively by measuring the release of hemoglobin.

527 In the first set of experiments we compared the pH dependence of hemolysis. Wild  
528 type and mutant virus with an HA-titer of  $2^6$  were adsorbed to chicken erythrocytes,  
529 the pH was adjusted to mildly acidic pH values between 5 and 7, erythrocytes with  
530 bound virus were incubated for 60 min at  $37^{\circ}\text{C}$  and hemoglobin release was  
531 determined spectroscopically. Beginning with pH 5.7 FPV\* wt causes hemoglobin  
532 release; the amount increased linearly with decreasing pH values (Fig. 7A) which is in  
533 agreement with published data on the fusion activity of the closely related H7  
534 Weybridge strain (55). All mutant viruses also start to cause hemolysis at pH 5.7, but  
535 the amount of released hemoglobin is reduced to ~ 30% with each virus and at all pH  
536 values. We also compared the kinetics of hemolysis by incubating pH 5 activated  
537 viruses for up to four hours with erythrocytes. The amount of released hemoglobin  
538 increases linearly with time for all viruses, but the slope of the line is much steeper

539 with FPV\* wt. At every time point the amount of released hemoglobin is clearly lower  
540 when using mutant virus particles (Fig. 7B).

541 Withdrawal of cholesterol from the viral membrane negatively and addition of  
542 cholesterol positively affect HA's membrane fusion activity (22, 23, 56, 57). In  
543 principle, the defect in the fusion activity of mutant viruses might be either due to  
544 altered biophysical properties of the viral membrane caused by their reduced  
545 cholesterol content or due to a more local or intrinsic functional defect in the HA  
546 molecule. To distinguish between both possibilities, we replenished the viral  
547 membrane with cholesterol by incubation of virus particles with cyclodextrin fully  
548 loaded with this lipid. Cholesterol measurements of virus preparations before and  
549 after incubation with cyclodextrin revealed for FPV\* wt and all mutant viruses a  
550 cholesterol increase of ~20-35%; mutant viruses have now a cholesterol content  
551 similar to or slightly higher than FPV\* wt before cholesterol addition. Hemolysis  
552 assays at pH5 showed an increase in hemoglobin release for both wild-type and  
553 mutant viruses by 10% to 35% after cholesterol loading (Fig. 7D) confirming the  
554 beneficial effect of cholesterol on membrane fusion. However, the hemolysis activity  
555 of cholesterol-enriched mutant viruses was in each experiment lower compared to  
556 untreated wild-type virus particles (Fig. 7C) indicating that the defect in membrane  
557 fusion persists even if the mutant particles have a cholesterol content like wild-type  
558 viruses.

559

560 **Mutations in the CCM decrease the hemifusion activity of HA**

561 A defect in hemolysis does not reveal which step in membrane fusion is affected,  
562 since release of hemoglobin requires lipid mixing as well as opening and widening of  
563 a fusion pore. In some HA mutants both events are uncoupled, for example HA with a  
564 glycolipid-anchor instead of the transmembrane domain (GPI-HA), causes hemifusion,  
565 but not full fusion (17). We were therefore interested whether or not viruses with  
566 mutations in the CCM of HA exhibit a defect in hemifusion. We employed the R18  
567 dequenching assay that allows monitoring lipid mixing between erythrocyte ghosts  
568 and virus particles. The lipophilic fluorophore octadecylrhodamine (R18) is integrated  
569 into the viral envelope at self-quenching concentrations. Upon binding of washed  
570 virus particles (adjusted to an HA-titer of  $2^{10}$ ) to ghosts and activation of HA's fusion  
571 activity by low pH treatment, viral and ghost lipids begin to mix. This causes  
572 dequenching of R18 and the resulting fluorescence increase is recorded in a  
573 fluorescence spectrometer. Once viral membrane fusion is completed, detergent is  
574 added that causes complete lysis of membranes. The maximal dequenching of R18's  
575 fluorescence is used to calculate the fusion activity at each time point.

576 Fig. 8A shows the mean relative fluorescence intensity of four fusion reactions plotted  
577 against the time course. After acidification to pH5 all FPV\* viruses exhibit a rapid  
578 increase in the fluorescence intensity, which reaches a plateau after ~ 2min. FPV\* wt  
579 exhibits a maximal fusion activity of 20%, which is clearly decreased in the mutants.

580 Normalizing the extent of fusion (FPV\* wt = 100%) shows a reduction to 75% for  
581 FPV\* LA and to ~ 50% for the double mutants FPV\* LW2A and YK2A (Fig. 8B).

582 Furthermore, fitting the curves revealed also differences in the fusion kinetics. 36 secs

583 is the half time for maximal fusion calculated for FPV\* wt and FPV\* LA, but this is  
584 extended to 57 secs for FPV\* LW2A and FPV\* YK2A. Since a similar result was  
585 obtained if the R18 assay was performed at pH 5.5 (except that the half times were  
586 longer for all viruses, data not shown), we conclude that mutations in the CCM of HA  
587 affect both the kinetics and the extent of lipid mixing.

588

### 589 **HA with a complete exchange of the CCM has a defect in hemifusion**

590 Finally, we asked whether the HA mutant with a complete exchange of the CCM also  
591 exhibits a defect in membrane fusion. Since no virus particles could be rescued for  
592 that mutant we had to rely on a cell-based fusion assay. As target we used  
593 double-labeled erythrocytes that contain R18 in their membrane and the soluble  
594 fluorophore calcein in their interior. After proteolytic cleavage and acid treatment of  
595 HA, R18 diffuses into the cellular plasma membrane whereas calcein stains the  
596 cytoplasm which can both be monitored in the fluorescence microscope.

597 Cells expressing HA YKLW4A clearly show hemifusion (cells in the upper left  
598 quadrant of Fig. 9A) and also full fusion (some cells in the right half of the figure)  
599 with erythrocytes. However, the number of fusion events is clearly reduced compared  
600 to HA wt, see Fig. 9B for an image of cells expressing HA YKLW4A or HA wt at  
601 lower magnification. One factor contributing to the lower fusion efficiency might be  
602 the retarded intracellular transport and reduced surface expression of HA YKLW4A  
603 (37). However, the number of bound erythrocytes per transfected cell culture plate is  
604 not obviously reduced with cells that express HA YKLW4A (micrograph in Fig. 9B)

605 and cells transfected with HA YKLW4A show similar hemadsorption activity as cells  
606 transfected with HA wt (not shown).

607 Furthermore, cells expressing HA YKLW4A show one peculiarity not observed for  
608 HA wt, namely erythrocytes tightly bound to cells after acid treatment that did not  
609 pass through either hemifusion or pore formation, i.e. no diffusion of R18 into the  
610 plasma membrane (see Fig. 9C for three examples) and of calcein into the cell's  
611 cytoplasm (not shown) did occur. We then selected cells with at least two bound  
612 erythrocytes and determined in the fluorescence channel whether the erythrocytes are  
613 unfused, hemifused or fully fused to the cells. We then calculated the percentage of  
614 individual fusion steps for HA wt or HA YKLW4A; the total number of selected cells  
615 was normalized to 100%. Cells transfected with HA wt did not show "binding" of  
616 erythrocytes after acidification, 58% of bound erythrocytes only passed the  
617 hemifusion step and 42% exhibit full fusion (Fig. 9D). Cells transfected with HA  
618 YKLW4A revealed a similar percentage of fully fused erythrocytes (45%), but  
619 reduced percentage of hemifused (28%) and 22% of bound, but unfused erythrocytes.

620 Thus, we conclude that HA YKLW4A exhibits mainly a defect in hemifusion and  
621 probably also in another step that precedes lipid mixing.

622 **DISCUSSION**

623 **Cholesterol binding to HA**

624 In this study we show for the first time that HA interacts with cholesterol. We  
625 demonstrate that complete exchange of the cholesterol consensus motif YK...LW in a  
626 group 2 HA (H7 subtype) by alanine greatly reduces (>50%) photo-crosslinking of a  
627 cholesterol analog to HA (Fig. 2). This was demonstrated by labeling transfected cells  
628 with photocholesterol and thus for HA embedded in its natural lipid environment  
629 where photocholesterol must compete with other membrane lipids for the binding site  
630 in HA. Furthermore, a similar result was obtained for purified HA  
631 immunoprecipitated from cell lysates excluding the possibility that the stronger  
632 labeling of HA wt is due to its integration into cholesterol-enriched nanodomains. HA  
633 with an exchange of two consecutive amino acids YK and LW by alanine did not  
634 reveal reduced labeling with photocholesterol (Fig. 2) suggesting that the residues  
635 synergistically interact with cholesterol. However, note that photocrosslinking is a  
636 qualitative tool to measure the cholesterol affinity of a protein and may not represent  
637 equilibrium concentrations of protein-cholesterol complexes. To more precisely  
638 determine the amino acids in HA which contact cholesterol more sophisticated  
639 methods, such as NMR or crystallography are required (36).

640 Our data are at odds with a recent report showing by high-resolution secondary ion  
641 mass spectrometry that HA clusters at the plasma membrane of transfected cells were  
642 not enriched with cholesterol (59). However, the observation was made with an H2  
643 subtype HA belonging to the phylogenetic group 1 that does not contain the YKLW



644 motif. Although HA clusters at the plasma membrane have been observed both for  
645 group 1 (e.g. H2, (6)) and group 2 HAs (e.g. H3, H7, (7, 9, 27)) their mechanism of  
646 clustering might be different. Interestingly, protease digestion experiments and  
647 molecular dynamics simulations revealed that the TMR of group 2 HAs have a more  
648 compact and protease-resistant quaternary structure compared to the TMR of group 1  
649 HAs (39).

650 The CCM is not only present in the consensus sequence of HAs of subtypes H3, H4,  
651 H7, H10, H14 and H15 (Fig. 1B), the amino acids YK...LW are also completely (99%)  
652 conserved within each subtype (60, supplementary file 1) arguing in favor for an  
653 essential role. Indeed, infectious virus particles could not be rescued if the CCM is  
654 completely exchanged; viral titers are lower if two amino acids are replaced. The  
655 mutant viruses are rapidly outgrown by wild-type indicating that they have a  
656 comparative fitness disadvantage (Fig. 3). It is thus safe to conclude that the CCM  
657 (and thus its interaction with cholesterol) is essential for Influenza virus replication,  
658 affecting both virus assembly and its cell entry via membrane fusion as discussed  
659 next.

660 Group 1 HAs do not possess the YK...LW motif, but contain the fairly conserved  
661 motif Y-K/Q...I-Y which also corresponds to the CCM defined for 7TMR  
662 (F/Y-R/K-I/V/L-Y/W). In addition, various rather loosely defined cholesterol  
663 recognition motifs exist that share a similar pattern of basic, aromatic and large  
664 hydrophobic amino acid (34). However, mutations at the boundary between the linker  
665 region and external part of the TMR do not retard transport of group 1 HAs to the

666 plasma membrane (51). Note also that a tyrosine which is important for the recently  
667 determined structure of the TMR region of a group 1 HA (residue 18 in Fig 1a, (42))  
668 is not conserved in group 2 HAs suggesting that both phylogenetic HA groups might  
669 exhibit different structures in this region.

670

671 **The role of the CCM for apical transport of HA and for virus assembly and**  
672 **budding**

673 Mutations in the CCM did not have an effect on apical budding of virus particles from  
674 polarized cells and did not affect transport of HA to the apical membrane (Fig. 4).  
675 Although signals for apical transport of HA are located in the TMR they do not  
676 overlap with signals that mediate inclusion of HA into detergent-resistant membranes  
677 a surrogate marker for association with cholesterol enriched nanodomains (52).  
678 However, the cholesterol content of mutant virus particles is significantly decreased  
679 by 10% (mutant LW2A) to 20% (YK2A, see Fig. 6). Assuming that the membrane of  
680 one spherical Influenza virus particle contains a total of 300.000 lipid molecules (as  
681 calculated for HIV particles that have the same size and hence lipid surface area (61)  
682 and ~ 50% (=150.000) are cholesterol (5), a decrease of 10-20% is equivalent to  
683 15.000-30.000 cholesterol molecules. An average Influenza virus particle contains  
684 300-500 trimeric HA spikes (as determined by Cryo-EM, (62, 63)) and thus at most ~  
685 1500 cholesterol binding sites are available. Based on this estimation it is evident that  
686 the 10-20% reduction in the cholesterol content cannot be explained by a  
687 stoichiometric (1:1) binding of cholesterol to HA. Instead, a cooperative effect must

688 be involved; the mutation in the CCM decreases the cholesterol content by 10-20  
689 cholesterol molecules per trimeric HA spike. One cholesterol molecule in direct  
690 contact with HA's CCM recruits (possibly by lipid-lipid interactions) other steroid  
691 molecules into virus particles. This assumption is supported by crystal structures of  
692 the  $\beta$ -adrenergic and other 7TM-receptors that exhibit two (or more) parallel aligned  
693 cholesterol molecules, but only one interacts directly with the CCM motif (35).  
694 10-20 cholesterol molecules would be sufficient to encase the outer part of  
695 transmembrane domain of one trimeric HA spike if we assume an  $\alpha$ -helix and  
696 cholesterol diameter of 1 and 0.5 nm, respectively. Such a lipid shell has been  
697 postulated to target transmembrane proteins to lipid domains or induce the formation  
698 of domains in a membrane that is poised to do so but is not yet phase-separated (64,  
699 65). Accordingly, the HA mutants YK2A and LW2A revealed reduced fluorescence  
700 resonance energy transfer (FRET) with a double-acylated raft-marker in transfected  
701 cells (37) and exchange of three amino acids at the beginning of the transmembrane  
702 region prevents raft-dependent clustering of H3-subtype HA at the plasma membrane  
703 (26). Mistargeting of HA might cause budding of virus particles through the  
704 (cholesterol-depleted) bulk phase of the plasma membrane. In accordance, the  
705 reduction of 10-20% cholesterol molecules in mutant virus particles is equivalent to a  
706 total cholesterol content of 45%, which corresponds to the cholesterol content  
707 determined for the whole apical membrane of polarized MDCK II cells (5).  
708 Mutations in the CCM do not only affect the lipids in the viral membrane, but also  
709 reduce incorporation of HA (relative to M1 and NP) into particles. This was evident

710 not only with viruses grown in MDCK II cells, but also (but less distinct) in  
711 embryonated eggs. The effect was most pronounced if the two amino acids LW in the  
712 TMR were exchanged (Fig. 5). A similar observation was made for H3 subtype HA  
713 from the filamentous Udorn strain having an exchange of the amino acids WIL at the  
714 beginning of the TMR (26). A priori one would rather assume that the HA content of  
715 mutant virus particles increases if viruses bud through the bulk phase of the plasma  
716 membrane but all other viral proteins are still mainly targeted to the original virus  
717 assembly site. However, assembly of viral proteins at the plasma membrane is a  
718 complicated process dependent on intrinsic signals in viral proteins as well as (partly  
719 transient) protein-protein interactions (8, 11, 12).

720 The mutation LW2A had the strongest effect on replication of virus in cell culture (Fig.  
721 3B, 4A) and on HA incorporation into virus particles (Fig. 5), whereas the cholesterol  
722 content was reduced in the mutant YK2A to a larger extent compared to LW2A (Fig.  
723 6). Note, however, that the data on the composition of virus particles show  
724 considerable variation between experiments, which is at least partly due to the  
725 pleomorphic nature of Influenza viruses. A recent study showed that even genetically  
726 homogenous virus particles released from a single infected cell show enormous  
727 variation in size and protein composition, i. e. the copy number of individual proteins  
728 vary up to 100 fold between virions (66). This low-fidelity assembly process makes it  
729 complicated to more precisely determine the effect of mutations on the morphology of  
730 Influenza virus particles.

731 An open question is the functional relationship between the two intrinsic nanodomain

732 targeting signals in HA, S-acylation at cytoplasmic cysteine residues and the  
733 cholesterol-binding amino acids at the beginning of the TMR. Removal of only one  
734 signal is sufficient to perturb raft association of HA (27, 29, 30). Both signals are  
735 essential for virus replication; their complete removal prevented creation of  
736 recombinant virus particles (this study and (18, 60, 67)). Viruses with partially deleted  
737 signals could be generated but revealed lower titers and defects in virus budding and  
738 membrane fusion (18, 26, 67). Otherwise, effects of mutating the two  
739 nanodomain-targeting signals are different. Removal of the acylation sites does not  
740 retard intracellular transport of HA (31, 68) and does not change the lipid composition  
741 (cholesterol content) of the viral membrane, at least not if virus-like particles were  
742 analyzed (69). How the functions of both raft-targeting signals interact to define the  
743 viral budding site remains unclear.

744 However, the interaction of HA with cholesterol does not necessarily occur only at the  
745 plasma membrane since the HA mutants exhibit strongly retarded transport through  
746 the Golgi (37), the part of the exocytic pathway in which the cholesterol concentration  
747 successively increases from ~5% (ER) to ~40% (plasma membrane) (58).

748

#### 749 **The role of the CCM for membrane fusion**

750 With three different assays using either virus particles or HA-expressing cells we  
751 show that mutations in the CCM of HA decrease both the kinetics and the extent of  
752 HA's fusion activity. A similar result was reported for H3-subtype HA that contains  
753 mutations at three amino acids at the beginning of the transmembrane region (26).

754 One contributing factor might be the reduced amount of HA at the surface of  
755 transfected cells (37) and in virus preparations (Fig. 4). However, we (at least partly)  
756 corrected for the latter by adjusting wild type and mutant viruses to the same HA-titer  
757 prior to the fusion assay. Thus, it is likely that the fusion defect is not (only) due to  
758 lower numbers of HA molecules at the fusion site, but a direct consequence of the  
759 mutations in the CCM of HA.

760 The R18 lipid mixing assay with mutant virus particles YK2A and LW2A as well as  
761 quantification of individual fusion events of HA YKLW4A-expressing cells revealed  
762 that the mutations in the CCM mainly affect the stage of lipid mixing (Fig. 7-9). Cells  
763 expressing HA YKLW4A showed another peculiarity, namely unfused erythrocytes  
764 still bound to their surface after low pH treatment (Fig. 9). In principle, this could be a  
765 fraction of HA YKLW4A molecules not activated by the low pH treatment and hence  
766 still bound in its pH 7 conformation to sialic-acid containing receptors on red blood  
767 cells. Alternatively, this HA YKLW4A fraction might have executed the first  
768 conformational change but has not completed the refolding step that causes fusion  
769 between viral and cellular membranes (1). In that case the fusion peptide has been  
770 exposed and inserted into the membrane thereby stabilizing the interaction between  
771 HA-expressing cells and erythrocytes at acidic pH. Our observation of tightly bound,  
772 but unfused erythrocytes to HA-expressing cells might correspond to early stages of  
773 HA-mediated membrane fusion recently observed by Cryo EM, e.g. HA-bridging,  
774 membrane dimpling and/or tightly docked membrane interfaces (70, 71). In any case,  
775 it suggests, that HA YKLW4A also has a defect in a membrane fusion step prior to

776 lipid mixing.

777 The reduced fusion activity of HA might be due to a global effect of the mutations in  
778 the CCM on the viral membrane. Virus particles exhibit reduced cholesterol content,  
779 and this might profoundly affect biophysical properties of the membrane beneficial  
780 for fusion (22, 23, 25, 56)). Indeed, when we loaded mutant virus particles with  
781 additional cholesterol the hemolysis activity increased (Fig. 7D). Nevertheless,  
782 cholesterol-loaded mutant virus particles revealed hemolysis values well below those  
783 determined for FPV\* wt without additional cholesterol loading although their  
784 cholesterol content is now roughly the same (Fig. 7C). Note also that the HA mutant  
785 YK2A has the lowest cholesterol content in the viral membrane (Fig. 6B), but HA  
786 LW2A exhibits the largest effect on virus infectivity and its hemolytic activity (Fig.  
787 3+7). Thus, the fusion defect is most likely not due to a general disadvantageous  
788 property of the viral membrane, such as disturbed liquid phase separation  
789 (raft-formation) and/or membrane ordering. We therefore rather prefer a model  
790 where a local interaction between cholesterol and the TMR of HA affects membrane  
791 fusion as proposed recently (57). One might envision that the CCM recruits  
792 cholesterol from the inner to the outer leaflet of the viral membrane, especially prior  
793 to hemifusion. The shape of cholesterol (small headgroup, large hydrophobic tail) is  
794 beneficial for the formation of a highly bended membrane intermediate, but only if  
795 cholesterol is located in the external leaflet, and not in the internal leaflet of the viral  
796 membrane (21, 72). Alternatively, cholesterol binding to the CCM (or more generally  
797 the amino acid exchanges we introduced) might affect the flexibility of HA's linker

798 region which may be important to facilitate the pH-dependent changes in HA  
799 conformation required for membrane fusion as recently suggested (42).

800 In sum, mutations in the cholesterol consensus motif of a group 2 HA affect various  
801 functionalities of the protein; its transport along the exocytic pathway, raft association  
802 at the plasma membrane (37), incorporation of cholesterol and HA into budding virus  
803 particles and virus entry via membrane fusion, especially lipid mixing and probably a  
804 preceding step. High resolution Cryo-EM of full length of a group 2 HA embedded in  
805 a membrane (similar to the one published for a group 1 HA (42)) might be helpful to  
806 determine the structure of the cholesterol binding pocket as one prerequisite to  
807 develop a small molecule that inactivates the virus.

808

#### 809 **ACKNOWLEDGEMENTS**

810 This work was supported by the German Research Foundation (SFB 740 TP C3) and  
811 by the Human Frontiers Science Program. Bodan Hu is recipient of a PhD fellowship  
812 from the China Scholarship Council (CSC). The funders had no role in study design,  
813 data collection and interpretation, or the decision to submit the work for publication.  
814 We thank Ralf Wagner and Hans-Dieter Klenk (Virology, Marburg) for providing the  
815 reverse genetics system used and Kai Ludwig (BioSupraMol, Chemistry and  
816 Biochemistry, FU Berlin) for performing electron microscopy.



817 **REFERENCES**

- 818 1. Skehel JJ, Wiley DC. 2000. Receptor binding and membrane fusion in virus  
819 entry: the influenza hemagglutinin. *Annu Rev Biochem* 69:531-69.
- 820 2. Whittaker GR. 2001. Intracellular trafficking of influenza virus: clinical  
821 implications for molecular medicine. *Expert Rev Mol Med* 2001:1-13.
- 822 3. Scheiffele P, Rietveld A, Wilk T, Simons K. 1999. Influenza viruses select  
823 ordered lipid domains during budding from the plasma membrane. *J Biol*  
824 *Chem* 274:2038-44.
- 825 4. Simons K, Gerl MJ. 2010. Revitalizing membrane rafts: new tools and insights.  
826 *Nat Rev Mol Cell Biol* 11:688-99.
- 827 5. Gerl MJ, Sampaio JL, Urban S, Kalvodova L, Verbavatz JM, Binnington B,  
828 Lindemann D, Lingwood CA, Shevchenko A, Schroeder C, Simons K. 2012.  
829 Quantitative analysis of the lipidomes of the influenza virus envelope and  
830 MDCK cell apical membrane. *J Cell Biol* 196:213-21.
- 831 6. Hess ST, Kumar M, Verma A, Farrington J, Kenworthy A, Zimmerberg J. 2005.  
832 Quantitative electron microscopy and fluorescence spectroscopy of the  
833 membrane distribution of influenza hemagglutinin. *J Cell Biol* 169:965-76.
- 834 7. Leser GP, Lamb RA. 2005. Influenza virus assembly and budding in  
835 raft-derived microdomains: a quantitative analysis of the surface distribution  
836 of HA, NA and M2 proteins. *Virology* 342:215-27.
- 837 8. Leser GP, Lamb RA. 2017. Lateral Organization of Influenza Virus Proteins in  
838 the Budozone Region of the Plasma Membrane. *J Virol* 91.

- 839 9. Hess ST, Gould TJ, Gudheti MV, Maas SA, Mills KD, Zimmerberg J. 2007.  
840 Dynamic clustered distribution of hemagglutinin resolved at 40 nm in living  
841 cell membranes discriminates between raft theories. *Proc Natl Acad Sci U S A*  
842 104:17370-5.
- 843 10. Veit M, Thaa B. 2011. Association of influenza virus proteins with membrane  
844 rafts. *Adv Virol* 2011:370606.
- 845 11. Chlanda P, Zimmerberg J. 2016. Protein-lipid interactions critical to  
846 replication of the influenza A virus. *FEBS Lett* 590:1940-54.
- 847 12. Rossman JS, Lamb RA. 2011. Influenza virus assembly and budding. *Virology*  
848 411:229-36.
- 849 13. Bottcher-Friebertshauser E, Klenk HD, Garten W. 2013. Activation of  
850 influenza viruses by proteases from host cells and bacteria in the human  
851 airway epithelium. *Pathog Dis* 69:87-100.
- 852 14. Chernomordik LV, Kozlov MM. 2005. Membrane hemifusion: crossing a  
853 chasm in two leaps. *Cell* 123:375-82.
- 854 15. Ivanovic T, Choi JL, Whelan SP, van Oijen AM, Harrison SC. 2013.  
855 Influenza-virus membrane fusion by cooperative fold-back of stochastically  
856 induced hemagglutinin intermediates. *Elife* 2:e00333.
- 857 16. Armstrong RT, Kushnir AS, White JM. 2000. The transmembrane domain of  
858 influenza hemagglutinin exhibits a stringent length requirement to support the  
859 hemifusion to fusion transition. *J Cell Biol* 151:425-37.
- 860 17. Kemble GW, Danieli T, White JM. 1994. Lipid-anchored influenza

- 861 hemagglutinin promotes hemifusion, not complete fusion. *Cell* 76:383-91.
- 862 18. Wagner R, Herwig A, Azzouz N, Klenk HD. 2005. Acylation-mediated  
863 membrane anchoring of avian influenza virus hemagglutinin is essential for  
864 fusion pore formation and virus infectivity. *J Virol* 79:6449-58.
- 865 19. Kozerski C, Ponimaskin E, Schroth-Diez B, Schmidt MF, Herrmann A. 2000.  
866 Modification of the cytoplasmic domain of influenza virus hemagglutinin  
867 affects enlargement of the fusion pore. *J Virol* 74:7529-37.
- 868 20. Melikyan GB, Markosyan RM, Roth MG, Cohen FS. 2000. A point mutation  
869 in the transmembrane domain of the hemagglutinin of influenza virus  
870 stabilizes a hemifusion intermediate that can transit to fusion. *Mol Biol Cell*  
871 11:3765-75.
- 872 21. Chernomordik LV, Kozlov MM. 2003. Protein-lipid interplay in fusion and  
873 fission of biological membranes. *Annu Rev Biochem* 72:175-207.
- 874 22. Biswas S, Yin SR, Blank PS, Zimmerberg J. 2008. Cholesterol promotes  
875 hemifusion and pore widening in membrane fusion induced by influenza  
876 hemagglutinin. *J Gen Physiol* 131:503-13.
- 877 23. Sun X, Whittaker GR. 2003. Role for influenza virus envelope cholesterol in  
878 virus entry and infection. *J Virol* 77:12543-51.
- 879 24. Chlanda P, Mekhedov E, Waters H, Schwartz CL, Fischer ER, Ryham RJ,  
880 Cohen FS, Blank PS, Zimmerberg J. 2016. The hemifusion structure induced  
881 by influenza virus haemagglutinin is determined by physical properties of the  
882 target membranes. *Nat Microbiol* 1:16050.

- 883 25. Domanska MK, Dunning RA, Dryden KA, Zawada KE, Yeager M, Kasson  
884 PM. 2015. Hemagglutinin Spatial Distribution Shifts in Response to  
885 Cholesterol in the Influenza Viral Envelope. *Biophys J* 109:1917-24.
- 886 26. Takeda M, Leser GP, Russell CJ, Lamb RA. 2003. Influenza virus  
887 hemagglutinin concentrates in lipid raft microdomains for efficient viral fusion.  
888 *Proc Natl Acad Sci U S A* 100:14610-7.
- 889 27. Engel S, Scolari S, Thaa B, Krebs N, Korte T, Herrmann A, Veit M. 2010.  
890 FLIM-FRET and FRAP reveal association of influenza virus haemagglutinin  
891 with membrane rafts. *Biochem J* 425:567-73.
- 892 28. Kordyukova LV, Serebryakova MV, Baratova LA, Veit M. 2008. S acylation of  
893 the hemagglutinin of influenza viruses: mass spectrometry reveals site-specific  
894 attachment of stearic acid to a transmembrane cysteine. *J Virol* 82:9288-92.
- 895 29. Scolari S, Engel S, Krebs N, Plazzo AP, De Almeida RF, Prieto M, Veit M,  
896 Herrmann A. 2009. Lateral distribution of the transmembrane domain of  
897 influenza virus hemagglutinin revealed by time-resolved fluorescence imaging.  
898 *J Biol Chem* 284:15708-16.
- 899 30. Scheiffele P, Roth MG, Simons K. 1997. Interaction of influenza virus  
900 haemagglutinin with sphingolipid-cholesterol membrane domains via its  
901 transmembrane domain. *Embo J* 16:5501-8.
- 902 31. Engel S, de Vries M, Herrmann A, Veit M. 2012. Mutation of a raft-targeting  
903 signal in the transmembrane region retards transport of influenza virus  
904 hemagglutinin through the Golgi. *FEBS Lett* 586:277-82.

- 905 32. Hanson MA, Cherezov V, Griffith MT, Roth CB, Jaakola VP, Chien EY,  
906 Velasquez J, Kuhn P, Stevens RC. 2008. A specific cholesterol binding site is  
907 established by the 2.8 Å structure of the human beta2-adrenergic receptor.  
908 *Structure* 16:897-905.
- 909 33. Epanand RM, Thomas A, Brasseur R, Epanand RF. 2010. Cholesterol interaction  
910 with proteins that partition into membrane domains: an overview. *Subcell*  
911 *Biochem* 51:253-78.
- 912 34. Fantini J, Barrantes FJ. 2013. How cholesterol interacts with membrane  
913 proteins: an exploration of cholesterol-binding sites including CRAC, CARC,  
914 and tilted domains. *Front Physiol* 4:31.
- 915 35. Gimpl G. 2016. Interaction of G protein coupled receptors and cholesterol.  
916 *Chem Phys Lipids* 199:61-73.
- 917 36. Yang ST, Kreutzberger AJB, Lee J, Kiessling V, Tamm LK. 2016. The role of  
918 cholesterol in membrane fusion. *Chem Phys Lipids* 199:136-143.
- 919 37. de Vries M, Herrmann A, Veit M. 2015. A cholesterol consensus motif is  
920 required for efficient intracellular transport and raft association of a group 2  
921 HA from influenza virus. *Biochem J* 465:305-14.
- 922 38. Wagner R, Gabriel G, Schlesner M, Alex N, Herwig A, Werner O, Klenk HD.  
923 2013. Protease activation mutants elicit protective immunity against highly  
924 pathogenic avian influenza viruses of subtype H7 in chickens and mice. *Emerg*  
925 *Microbes Infect* 2:e7.
- 926 39. Kordyukova LV, Serebryakova MV, Polyansky AA, Kropotkina EA,

- 927 Alexeevski AV, Veit M, Efremov RG, Filippova IY, Baratova LA. 2011. Linker  
928 and/or transmembrane regions of influenza A/Group-1, A/Group-2, and type B  
929 virus hemagglutinins are packed differently within trimers. *Biochim Biophys*  
930 *Acta* 1808:1843-54.
- 931 40. Wilson IA, Skehel JJ, Wiley DC. 1981. Structure of the haemagglutinin  
932 membrane glycoprotein of influenza virus at 3 Å resolution. *Nature*  
933 289:366-73.
- 934 41. Brand CM, Skehel JJ. 1972. Crystalline antigen from the influenza virus  
935 envelope. *Nat New Biol* 238:145-7.
- 936 42. Benton DJ, Nans A, Calder LJ, Turner J, Neu U, Lin YP, Ketelaars E,  
937 Kallewaard NL, Corti D, Lanzavecchia A, Gamblin SJ, Rosenthal PB, Skehel  
938 JJ. 2018. Influenza hemagglutinin membrane anchor. *Proc Natl Acad Sci U S*  
939 *A* 115:10112-10117.
- 940 43. Mineev KS, Lyukmanova EN, Krabben L, Serebryakova MV, Shulepko MA,  
941 Arseniev AS, Kordyukova LV, Veit M. 2013. Structural investigation of  
942 influenza virus hemagglutinin membrane-anchoring peptide. *Protein Eng Des*  
943 *Sel* 26:547-52.
- 944 44. Tatulian SA, Tamm LK. 2000. Secondary structure, orientation,  
945 oligomerization, and lipid interactions of the transmembrane domain of  
946 influenza hemagglutinin. *Biochemistry* 39:496-507.
- 947 45. Brett K, Kordyukova LV, Serebryakova MV, Mintaev RR, Alexeevski AV, Veit  
948 M. 2014. Site-specific S-acylation of influenza virus hemagglutinin: the

- 949 location of the acylation site relative to the membrane border is the decisive  
950 factor for attachment of stearate. *J Biol Chem* 289:34978-89.
- 951 46. Thiele C, Hannah MJ, Fahrenholz F, Huttner WB. 2000. Cholesterol binds to  
952 synaptophysin and is required for biogenesis of synaptic vesicles. *Nat Cell*  
953 *Biol* 2:42-9.
- 954 47. Mintzer EA, Waarts BL, Wilschut J, Bittman R. 2002. Behavior of a  
955 photoactivatable analog of cholesterol, 6-photocholesterol, in model  
956 membranes. *FEBS Lett* 510:181-4.
- 957 48. Hulce JJ, Cognetta AB, Niphakis MJ, Tully SE, Cravatt BF. 2013.  
958 Proteome-wide mapping of cholesterol-interacting proteins in mammalian  
959 cells. *Nat Methods* 10:259-64.
- 960 49. Rodriguez-Boulan E, Paskiet KT, Salas PJ, Bard E. 1984. Intracellular  
961 transport of influenza virus hemagglutinin to the apical surface of  
962 Madin-Darby canine kidney cells. *J Cell Biol* 98:308-19.
- 963 50. Barman S, Ali A, Hui EK, Adhikary L, Nayak DP. 2001. Transport of viral  
964 proteins to the apical membranes and interaction of matrix protein with  
965 glycoproteins in the assembly of influenza viruses. *Virus Res* 77:61-9.
- 966 51. Lin S, Naim HY, Rodriguez AC, Roth MG. 1998. Mutations in the middle of  
967 the transmembrane domain reverse the polarity of transport of the influenza  
968 virus hemagglutinin in MDCK epithelial cells. *J Cell Biol* 142:51-7.
- 969 52. Tall RD, Alonso MA, Roth MG. 2003. Features of influenza HA required for  
970 apical sorting differ from those required for association with DRMs or MAL.

- 971 Traffic 4:838-49.
- 972 53. Mora R, Rodriguez-Boulan E, Palese P, Garcia-Sastre A. 2002. Apical budding  
973 of a recombinant influenza A virus expressing a hemagglutinin protein with a  
974 basolateral localization signal. *J Virol* 76:3544-53.
- 975 54. Jin H, Leser GP, Zhang J, Lamb RA. 1997. Influenza virus hemagglutinin and  
976 neuraminidase cytoplasmic tails control particle shape. *EMBO J* 16:1236-47.
- 977 55. Daniels RS, Downie JC, Hay AJ, Knossow M, Skehel JJ, Wang ML, Wiley  
978 DC. 1985. Fusion mutants of the influenza virus hemagglutinin glycoprotein.  
979 *Cell* 40:431-9.
- 980 56. Domanska MK, Wrona D, Kasson PM. 2013. Multiphasic effects of  
981 cholesterol on influenza fusion kinetics reflect multiple mechanistic roles.  
982 *Biophys J* 105:1383-7.
- 983 57. Zawada KE, Wrona D, Rawle RJ, Kasson PM. 2016. Influenza viral  
984 membrane fusion is sensitive to sterol concentration but surprisingly robust to  
985 sterol chemical identity. *Sci Rep* 6:29842.
- 986 58. van Meer G, Voelker DR, Feigenson GW. 2008. Membrane lipids: where they  
987 are and how they behave. *Nat Rev Mol Cell Biol* 9:112-24.
- 988 59. Wilson RL, Frisz JF, Klitzing HA, Zimmerberg J, Weber PK, Kraft ML. 2015.  
989 Hemagglutinin clusters in the plasma membrane are not enriched with  
990 cholesterol and sphingolipids. *Biophys J* 108:1652-1659.
- 991 60. Siche S, Brett K, Moller L, Kordyukova LV, Mintaev RR, Alexeevski AV, Veit  
992 M. 2015. Two Cytoplasmic Acylation Sites and an Adjacent Hydrophobic



- 993 Residue, but No Other Conserved Amino Acids in the Cytoplasmic Tail of HA  
994 from Influenza A Virus Are Crucial for Virus Replication. *Viruses* 7:6458-75.
- 995 61. Brugger B, Glass B, Haberkant P, Leibrecht I, Wieland FT, Krausslich HG.  
996 2006. The HIV lipidome: a raft with an unusual composition. *Proc Natl Acad*  
997 *Sci U S A* 103:2641-6.
- 998 62. Harris A, Cardone G, Winkler DC, Heymann JB, Brecher M, White JM,  
999 Steven AC. 2006. Influenza virus pleiomorphy characterized by cryoelectron  
1000 tomography. *Proc Natl Acad Sci U S A* 103:19123-7.
- 1001 63. Moules V, Terrier O, Yver M, Riteau B, Moriscot C, Ferraris O, Julien T,  
1002 Giudice E, Rolland JP, Erny A, Bouscambert-Duchamp M, Frobert E,  
1003 Rosa-Calatrava M, Pu Lin Y, Hay A, Thomas D, Schoehn G, Lina B. 2011.  
1004 Importance of viral genomic composition in modulating glycoprotein content  
1005 on the surface of influenza virus particles. *Virology* 414:51-62.
- 1006 64. Anderson RG, Jacobson K. 2002. A role for lipid shells in targeting proteins to  
1007 caveolae, rafts, and other lipid domains. *Science* 296:1821-5.
- 1008 65. Jacobson K, Mouritsen OG, Anderson RG. 2007. Lipid rafts: at a crossroad  
1009 between cell biology and physics. *Nat Cell Biol* 9:7-14.
- 1010 66. Vahey MD, Fletcher DA. 2019. Low-Fidelity Assembly of Influenza A Virus  
1011 Promotes Escape from Host Cells. *Cell* 176:281-294 e19.
- 1012 67. Chen BJ, Takeda M, Lamb RA. 2005. Influenza virus hemagglutinin (H3  
1013 subtype) requires palmitoylation of its cytoplasmic tail for assembly: M1  
1014 proteins of two subtypes differ in their ability to support assembly. *J Virol*

- 1015 79:13673-84.
- 1016 68. Veit M, Kretzschmar E, Kuroda K, Garten W, Schmidt MF, Klenk HD, Rott R.  
1017 1991. Site-specific mutagenesis identifies three cysteine residues in the  
1018 cytoplasmic tail as acylation sites of influenza virus hemagglutinin. *J Virol*  
1019 65:2491-500.
- 1020 69. Chlanda P, Mekhedov E, Waters H, Sodt A, Schwartz C, Nair V, Blank PS,  
1021 Zimmerberg J. 2017. Palmitoylation Contributes to Membrane Curvature in  
1022 Influenza A Virus Assembly and Hemagglutinin-Mediated Membrane Fusion.  
1023 *J Virol* 91.
- 1024 70. Calder LJ, Rosenthal PB. 2016. Cryomicroscopy provides structural snapshots  
1025 of influenza virus membrane fusion. *Nat Struct Mol Biol* 23:853-8.
- 1026 71. Gui L, Ebner JL, Mileant A, Williams JA, Lee KK. 2016. Visualization and  
1027 Sequencing of Membrane Remodeling Leading to Influenza Virus Fusion. *J*  
1028 *Virol* 90:6948-6962.
- 1029 72. Zimmerberg J, Kozlov MM. 2006. How proteins produce cellular membrane  
1030 curvature. *Nat Rev Mol Cell Biol* 7:9-19.
- 1031
- 1032

1033 **FIGURE LEGENDS**

1034 **Figure 1: Cholesterol consensus motif (CCM) in HAs of the phylogenetic group 2**

1035 (A) Conservation of the CCM (amino acids YK...LW) in group 2, but not group 1  
1036 HAs. A consensus sequence for each HA subtype was assembled from each HA  
1037 sequence present in the database (60). The consensus sequence of group 1 (H1, H2,  
1038 H5, H6, H8, H9, H11, H12, H13, H16 subtypes) and group 2 HAs (H3, H4, H7, H10,  
1039 H14, H15) was then used for the analysis by the WebLogo 3.3 server  
1040 <http://weblogo.threeplusone.com/create.cgi>. The height of the stack indicates the  
1041 sequence conservation, while the heights of each letter the relative frequency of an  
1042 amino acid at that position. The start and end of the linker region and the start of the  
1043 transmembrane region (TMR) are indicated by arrows.

1044 (B) Helical wheel projection (<http://lbqp.unb.br/NetWheels/>) of the sequence  
1045 YKDVILW of H7 subtype HA. Amino acids forming the CCM are shown as white  
1046 squares. Y, K, L are on one side of the helix; W is on the other side and thus must be  
1047 located on another HA monomer of the trimeric spike to contribute to binding of the  
1048 same cholesterol molecule, but this arrangement of TMR helices is speculative.

1049

1050 **Figure 2: Photocholesterol labeling of HA wt and HA with mutations in the CCM**

1051 (A) Formula of click-photocholesterol (6'-Azi-25-ethynyl-27-norcholestan-3 $\beta$ -ol). The  
1052 functional groups diazirine (blue) and azide (red) are encircled.

1053 (B-D) Labeling of CHO-cells expressing HA wt or HA YKLW4A.

1054 After labeling for 16 hours, cells were exposed to uv-light and lysed with 1% Triton.

1055 10% of the lysate was subjected to SDS-PAGE followed by western-blotting with  
1056 HA2 specific-antiserum to monitor expression levels of HA (B). 90% of the lysate  
1057 was immunoprecipitated with the same antiserum, HA-photocholesterol was clicked  
1058 to Cy3 fluorophore, samples were subjected to reducing SDS-PAGE and the  
1059 fluorescence in the gel was scanned (C). Quantification: Band intensities of (B) and  
1060 (C) of this and five other experiments were determined and normalized to HA wt =  
1061 100%. The mean (58%)  $\pm$  standard deviation ( $\pm$ 13%) is shown (D).  
1062 (E-G) Labeling of immunoprecipitated HA wt or HA YKLW4A.  
1063 24 hours after transfection CHO cells expressing HA wt or HA YKLW4A were lysed.  
1064 10% of the lysate was subjected to SDS-PAGE followed by western-blotting (E). 90%  
1065 of the lysate was immunoprecipitated, washed antibody-HA complexes were  
1066 incubated with photocholesterol, uv-irradiated and clicked to Cy3 fluorophore prior to  
1067 reducing SDS-PAGE and fluorescence scanning (F). Quantification: Band intensities  
1068 of (E) and (F) of this and three other experiments were determined and normalized to  
1069 HA wt = 100%. The mean (38%)  $\pm$  standard deviation ( $\pm$ 5%) is shown (G). The  
1070 asterisks indicate statistically significant differences (\*\*\*\*P < 0.0001) between wt and  
1071 the mutant according to a Student's t-test. Mock: untransfected cells. kDa:  
1072 Molecular weight markers. HA YKLW4A was in each experiment (B-E) expressed at  
1073 higher levels as HA wt.  
1074 (H+I) Labeling of CHO-cells expressing HA wt, HA LA, HA YK2A and HA LW2A.  
1075 Experiment was performed as described in (B) and (C). Quantification: Band  
1076 intensities of (H) and (I) of this and two other experiments were determined and

1077 normalized to HA wt = 100%. The mean  $\pm$  standard deviation is shown (J). HA LA  
1078  $0.92\pm 0.11$ , YK2A  $0.99\pm 0.30$  and LW2A  $0.97\pm 0.34$  relative to HA wt.

1079

1080 **Fig. 3: Effect of mutations in the CCM on virus replication**

1081 (A+B) Growth curves of FPV\* wt and FPV\* with the indicated mutations in the CCM  
1082 of HA. MDCK II cells were infected with virus at an m.o.i. of 0.0005. Culture  
1083 supernatants were harvested at the indicated times and tested with HA-assay (A) or  
1084 TCID50 (B). Experiments were carried out in triplicate and are displayed as  
1085 means  $\pm$  standard deviation. Asterisk indicate statistically significant differences (\*P <  
1086 0.05, \*\*P < 0.01) between wt and the mutant LW2A according to a Student's t-test.

1087 (C) Competitive growth of FPV\* wt and FPV\* mutants. Sequencing chromatograms  
1088 of cDNA of wild-type and mutant FPV\*. MDCK II cells were infected (total moi:  
1089 0.0005) with FPV\* wt and FPV\* YK2A (left) or FPV\* LW2A (right) mixed at ratio of  
1090 1:5. Supernatants were collected before or at the indicated times after infection, the  
1091 viral RNA was isolated and subjected to rtPCR and sequencing. The nucleotide  
1092 sequences of wt and mutant HA are listed above the chromatogram.

1093

1094 **Fig. 4 Effect of mutations in the CCM on apical virus budding and transport of**  
1095 **HA in polarized cells**

1096 (A) Virus budding in polarized MDCK II cells. Polarized MDCK II cells were  
1097 infected with viruses at a m.o.i. of 0.001. Culture medium from both the upper (apical)  
1098 and lower (baso) chamber was harvested at 8h, 24h, 34h, and 48h post infection and

1099 virus titers were determined by HA-assays. Asterisk indicate statistically significant  
1100 differences (\*P < 0.05, \*\*P < 0.01) between wt and the mutant LW2A according to a  
1101 Student's t-test.

1102 (B) HA mutant LA, YK2A and LW2A transport in MDCK II cells. Polarized MDCK  
1103 II cells were infected with the respective viruses at a m.o.i. of 1. 6h post infection,  
1104 cells were fixed and stained with anti-HA2 antiserum and anti- $\beta$ -catenin antibody  
1105 (basolateral marker), followed by secondary antibody coupled to Alexa Fluor 568 (red  
1106 for HA) and Alexa Fluor 488 (green for catenin), respectively.

1107 (C) HA mutant YKLW4A transport in polarized MDCK II cells. MDCK II cells were  
1108 transfected with HA mutant YKLW4A and HA wt one day after they were seeded into  
1109 24 mm transwell filter membranes. 4 days post transfection; cells were fixed and  
1110 permeablized, and stained with primary and secondary antibody as described in (B).  
1111 Z-sections with 0.5  $\mu$ m increments from polarized cells are shown in (B) and (C).  
1112 Staining of intracellular structures is visible in (C) especially for YKLW4A since the  
1113 cells were permeabilized.

1114

1115 **Fig. 5: Effect of mutations in the CCM on HA incorporation into virus particles**

1116 (A+C) Protein composition of FPV\* particles purified from embryonated eggs (A)  
1117 and MDCK II cells (C). Viruses were purified using a sucrose gradient (20%-60%)  
1118 and subjected to non-reducing SDS-PAGE and Coomassie staining. The position of  
1119 the major viral proteins is indicated on the right-hand side, and molecular mass  
1120 markers (kDa) are shown on the left-hand side.

1121 (B+D) Quantification of the relative protein composition. Density of HA, NP and M1  
1122 bands was determined and the HA/NP and HA/M1 ratios were calculated and  
1123 normalized to wild type. Results from three virus preparations are displayed as means  
1124  $\pm$ standard deviation. Asterisk (\*) indicate statistically significant differences (\*P <  
1125 0.05) between wt and the mutant LW2A according to a Student's t-test.

1126

1127 **Fig. 6: Effect of mutations in the CCM on cholesterol content and virus**  
1128 **morphology**

1129 (A) Cholesterol content of FPV\* wild-type (wt) and FPV\* mutant particles  
1130 sucrose-purified from MDCK II cells. Dots indicate the cholesterol concentration ( $\mu$ M)  
1131 divided by the protein concentration (ng/ $\mu$ l) for each of three virus preparations; the  
1132 horizontal bar is the mean. Viruses prepared from sister cultures and analyzed in  
1133 parallel are indicated with the same color.

1134 (B) Normalized cholesterol content (wt=100%) of FPV\* mutant particles. Asterisk (\*)  
1135 indicate statistically significant differences (\*P < 0.05, \*\*P < 0.01) between wt and  
1136 the mutant YK2A or mutant LW2A according to a Student's t-test.

1137

1138 **Fig. 7: Effect of mutations in the CCM on hemolysis**

1139 (A) pH dependence: FPV\* wt and FPV\* mutant particles were adjusted to an HA-titer  
1140 of  $2^6$ , adsorbed to chicken erythrocytes and pelleted. Samples were adjusted to the  
1141 indicated pH values and incubated for 60 min at 37°C. Released hemoglobin (OD  
1142 405,) is plotted against the virus titer. Results are depicted as means $\pm$ standard

1143 deviation from three experiments. NC: negative control: Incubation of RBCs without  
1144 virus.

1145 (B) time dependence: Hemolysis was initiated with pH 5 treatment and aliquots were  
1146 removed after 0.5, 1, 2, 3 and 4 hours. Results are depicted as means±standard  
1147 deviation from three experiments.

1148 (C+D): Comparison of hemolytic activity before and after loading of FPV\* wt and  
1149 FPV\* mutant virus particles with cholesterol. Hemolysis was performed after  
1150 acidification to pH 5 for 60 min at 37°C with viruses adjusted to an HA-titer of  $2^8$ . C:  
1151 OD measurements of individual experiments with virus before (open symbols) and  
1152 after (closed symbols) loading with cholesterol. Viruses prepared from sister cell  
1153 cultures, loaded with cholesterol and measured in parallel are indicated with the same  
1154 color. Note that in each experiment the hemolytic activity of mutant virus particles  
1155 after loading with cholesterol is lower than the corresponding wild type viruses before  
1156 cholesterol loading. D: Normalized increase in hemolytic activity relative to untreated  
1157 virus particles (=1) from the same virus preparation. Results of three experiments are  
1158 shown as mean±standard deviation.

1159

### 1160 **Fig. 8: Effect of mutations in the CCM on hemifusion**

1161 (A) Fluorescence dequenching assay using erythrocyte ghosts labelled in the  
1162 membrane with the self-quenching lipophilic fluorophore R18. FPV\* wt and mutant  
1163 viruses were adjusted to an HA-titer of  $2^{10}$ , adsorbed to R18-labeled ghosts and the  
1164 fusion reaction was started by adjusting the pH to 5. The graph shows the mean of



1165 four experiments with two virus preparations. Relative fluorescence dequenching  
1166 (FDQ, dequenching with Triton-X-100 = 100%) is plotted against the time (min).  
1167 (B) Relative extent of fusion (FDQ after 10 min and normalized to wt =100%) is  
1168 shown as the mean±standard deviation of the four experiments. Asterisk indicate  
1169 statistically significant differences (\*P < 0.05, \*\*P < 0.01, \*\*\*P < 0.001) between wt  
1170 and the mutants according to a Student's t-test. Fitting the curves revealed also a delay  
1171 in the half time for fusion for the double mutants. The following data were calculated:  
1172 wt=0.59±0.05 min, LA=0.6±0.1; YK2A= 0.9±0.18; LW2A=0.95±0.1.

1173

1174 **Fig. 9: Effect of complete exchange of the CCM on fusion of cells to erythrocytes**

1175 Fusion of CHO cells expressing HA YKLW4A or HA wt with erythrocytes labeled  
1176 with the lipid marker R18 and the content marker calcein. 24 hours after transfection  
1177 cells were treated with trypsin to cleave HA and incubated with double-labelled  
1178 erythrocytes. Unbound erythrocytes were washed off and cells were treated for 5 min  
1179 with pH 5, neutralized and monitored with a fluorescence microscope in the calcein  
1180 channel and R18 channel.

1181 (A) Fluorescence microscopy (40x magnification) show diffusion of calcein (green)  
1182 into the cytoplasm and of R18 (red) into the plasma membrane of cells expressing HA  
1183 YKLW4A. Mock: untransfected cells do not show tight binding of erythrocytes to  
1184 cells.

1185 (B) Comparison of the number of fusion events recorded for HA wt and HA  
1186 YKLW4A at 20x magnification. Note that the number of erythrocytes is roughly the

1187 same in both microscopic fields, but cells expressing HA YKLW4A exhibit less  
1188 hemifusion or full fusion.

1189 (C) Three examples of cells expressing HA YKLW4A that exhibit after acidification  
1190 binding of erythrocytes that neither underwent hemifusion (diffusion of red dye into  
1191 the plasma membrane) nor full fusion (diffusion of green dye into the cell's interior,  
1192 not displayed).

1193 (D) Relative quantification of individual fusion events for cells expressing HA wt or  
1194 HA YKLW4A. In three transfections at least 100 cells with at least two bound  
1195 erythrocytes were selected and (based on the result in the fluorescence channel)  
1196 grouped into one of three categories, either unfused (=binding), hemifused or fully  
1197 fused to erythrocytes. The total number of counted cells was normalized (=100%) and  
1198 the percentage of events in each category was calculated and is displayed as the mean  
1199  $\pm$ standard deviation.

**A**

## Group 1 HA

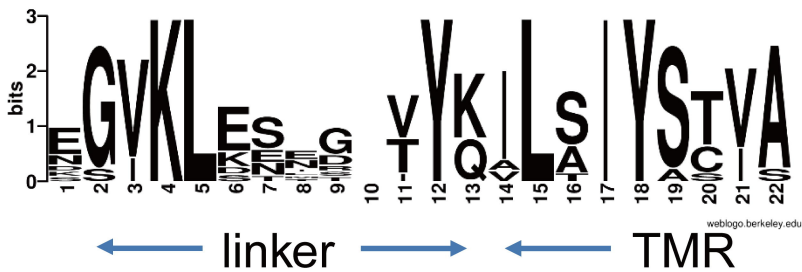

## Group 2 HA

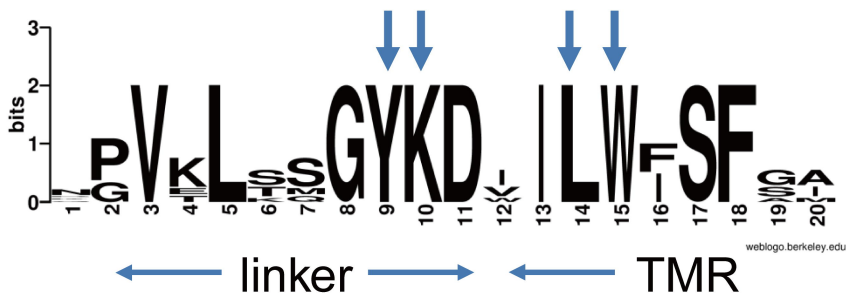**B**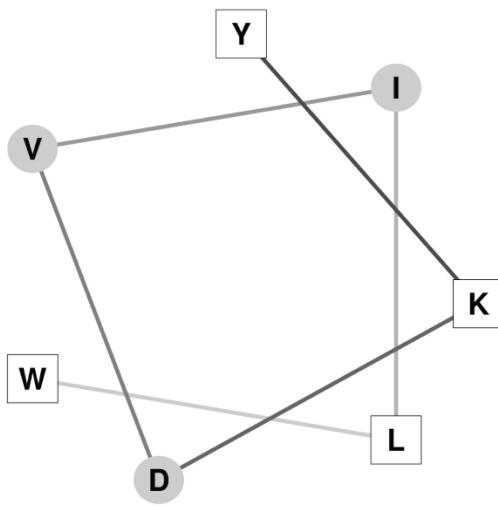

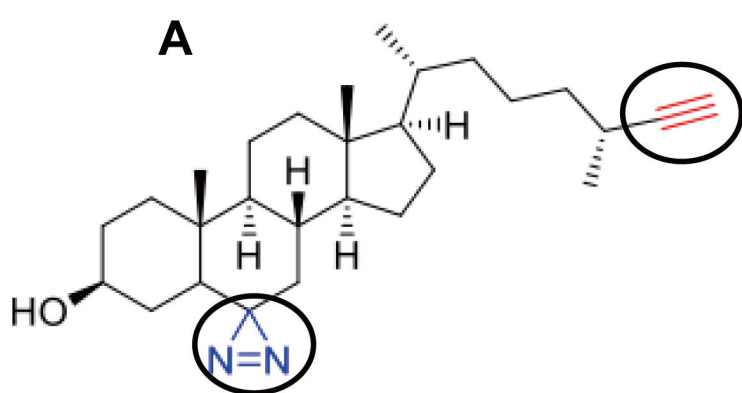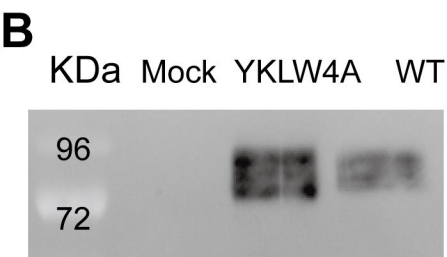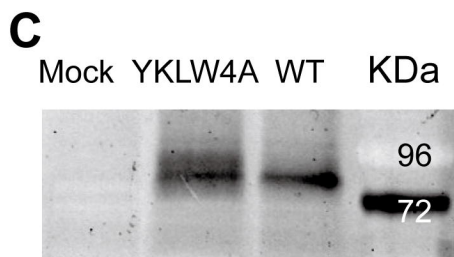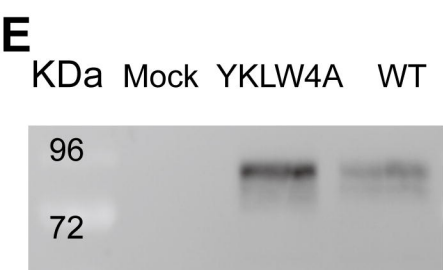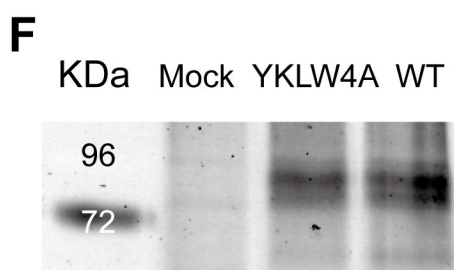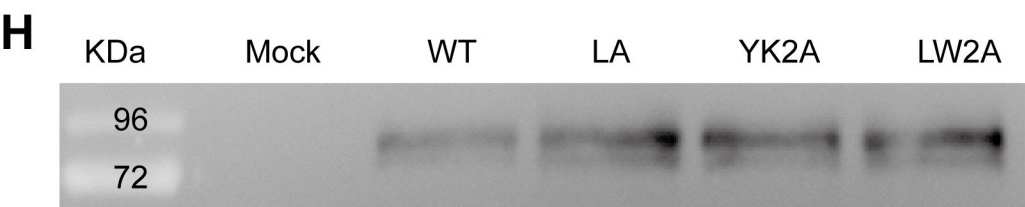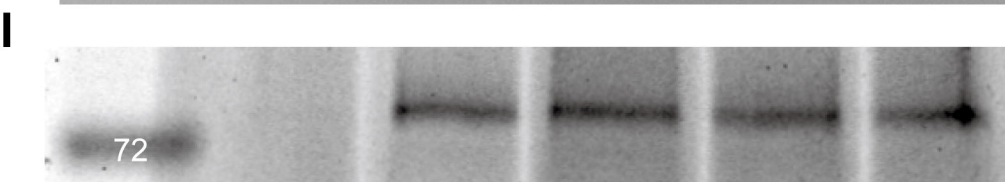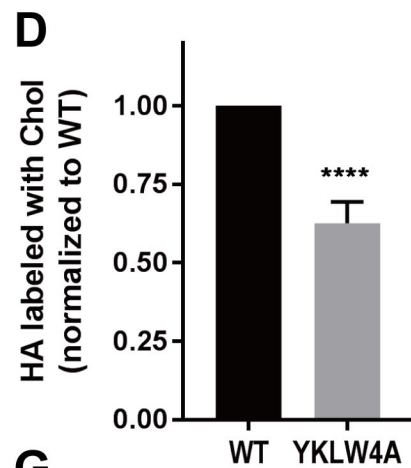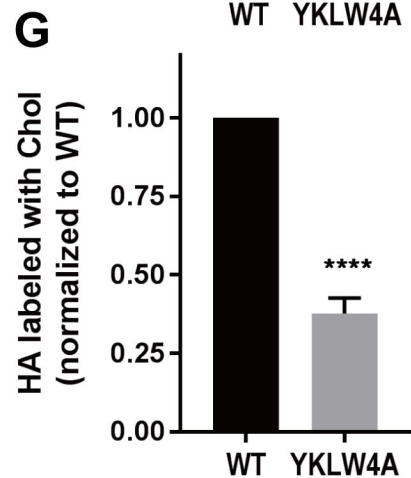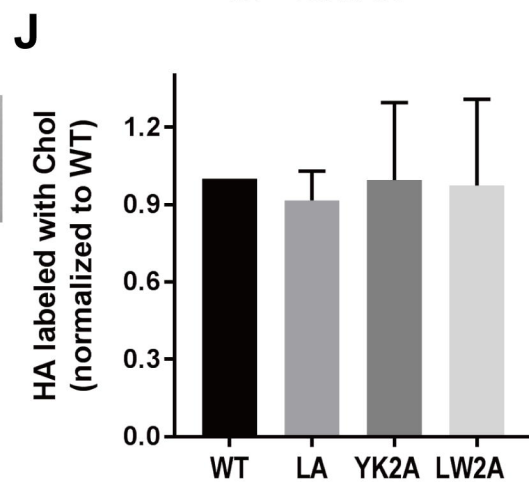

**A**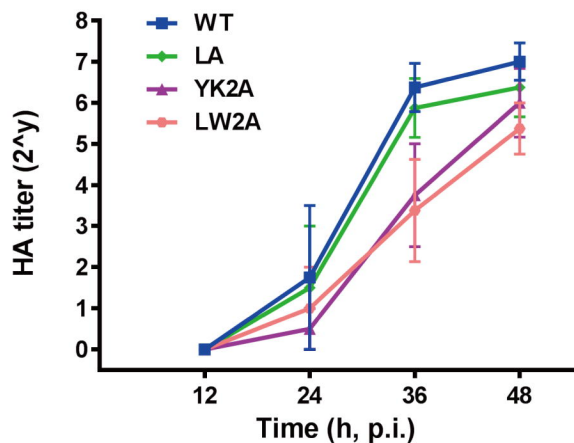**B**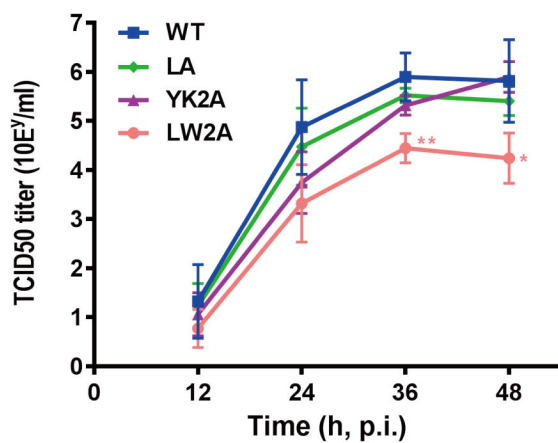**C**

YK2A: GCTGCA WT: TACAAA

LW2A: GCAGCT WT: CTTTGG

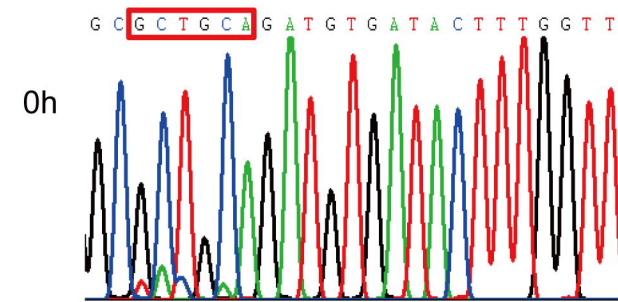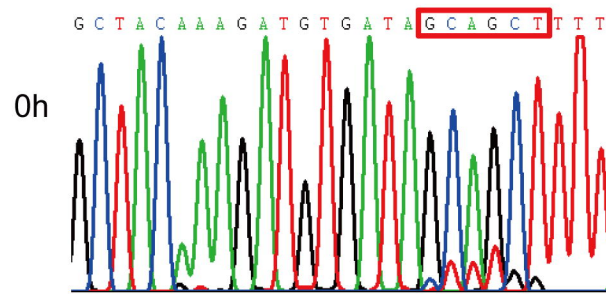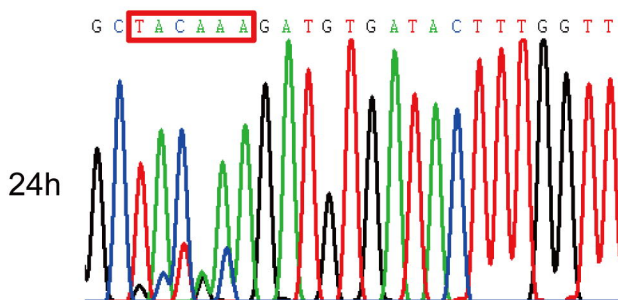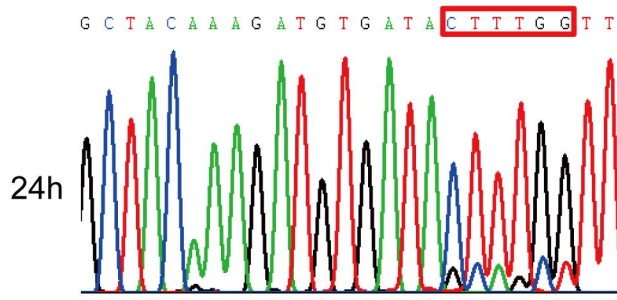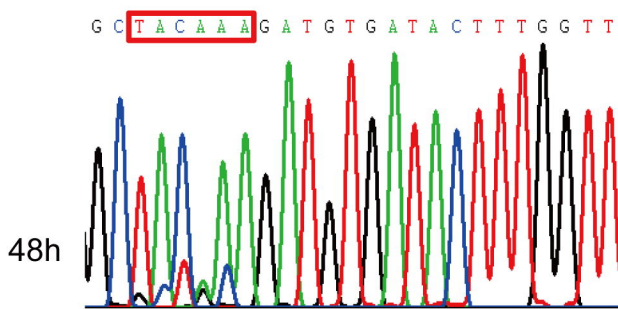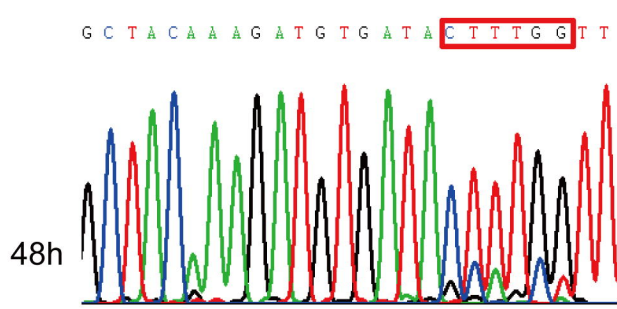

**A**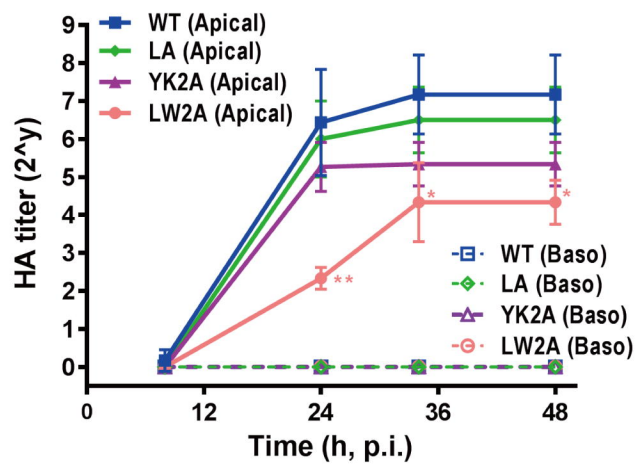**B**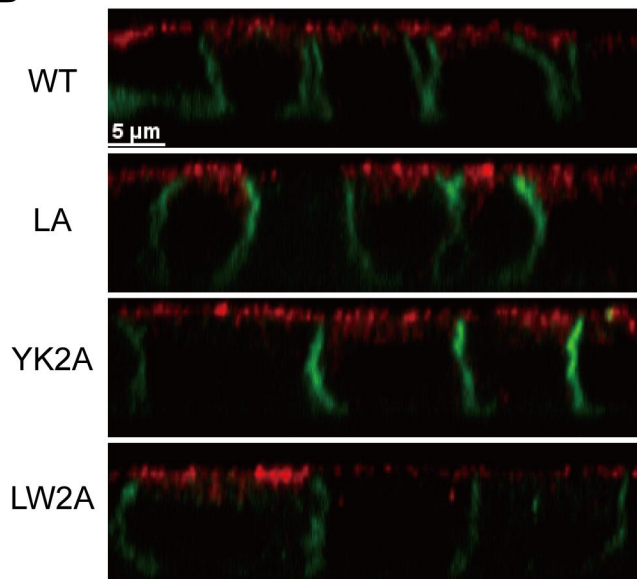**C**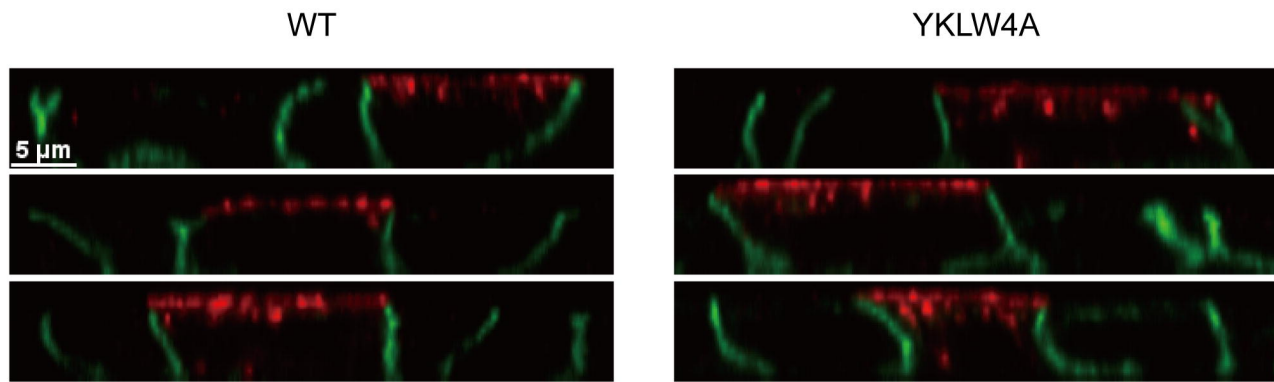

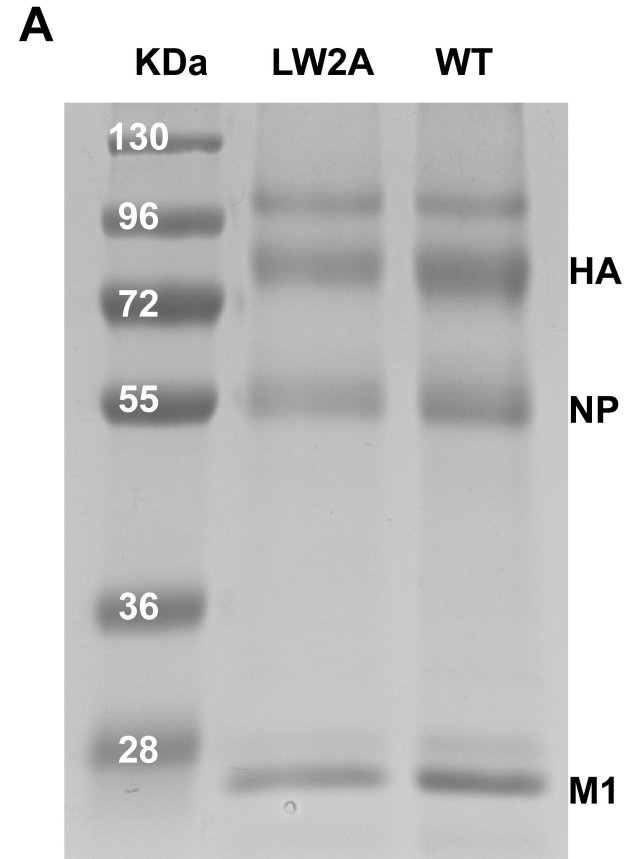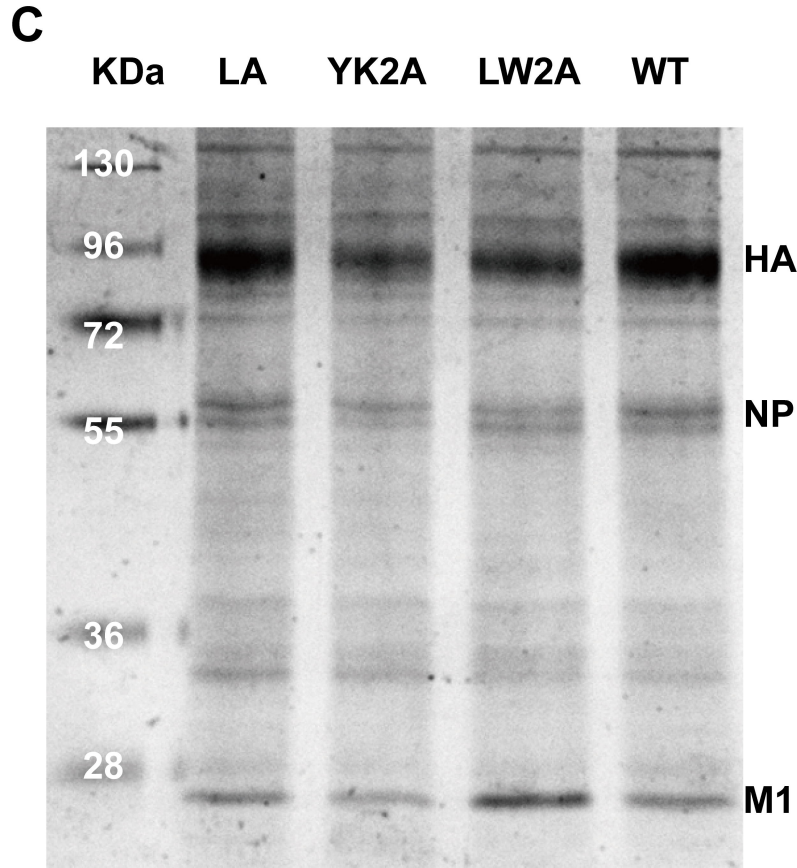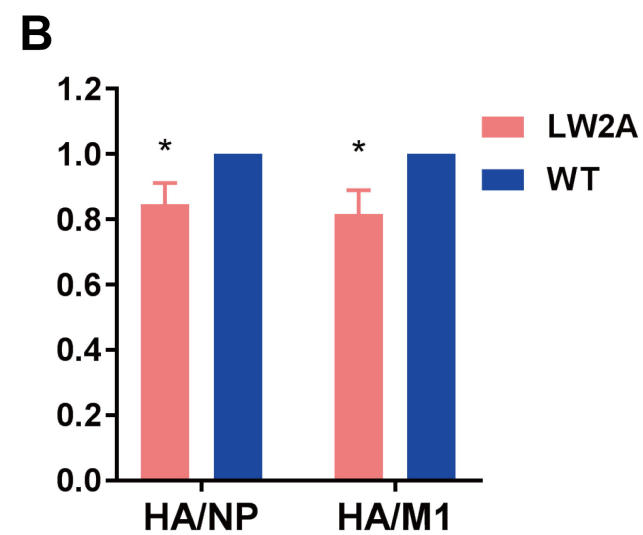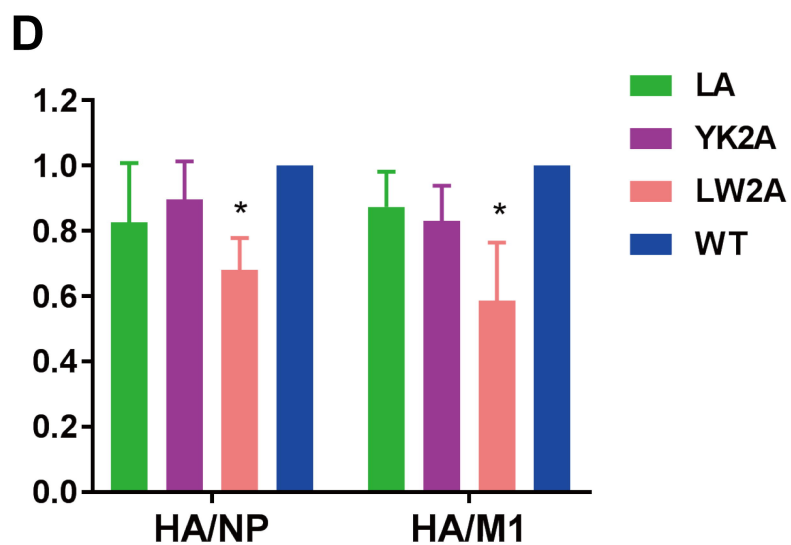

**A**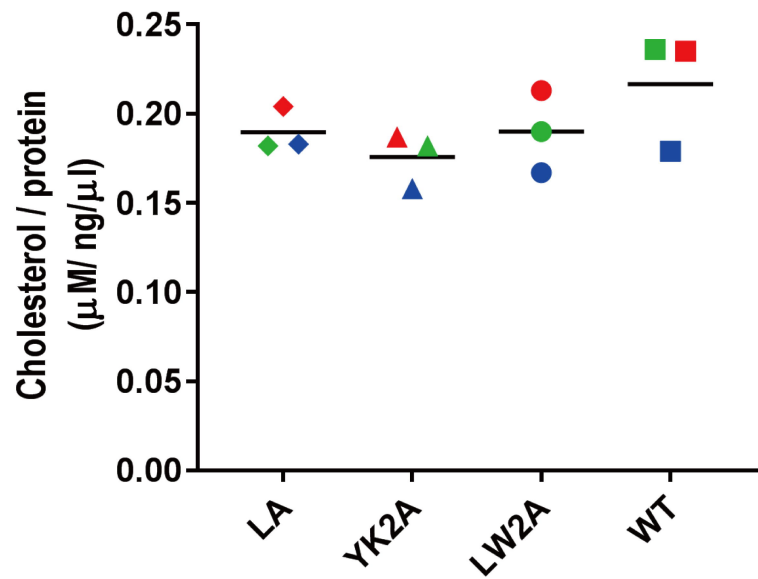**B**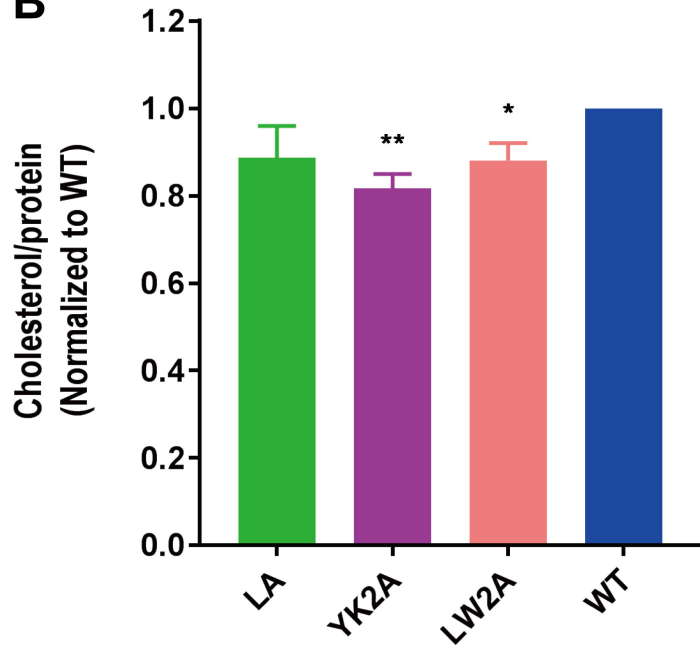



**A**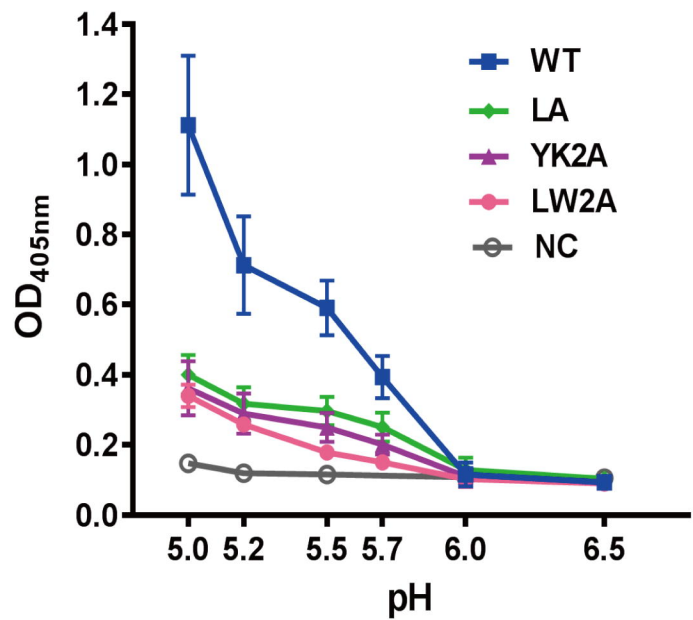**B**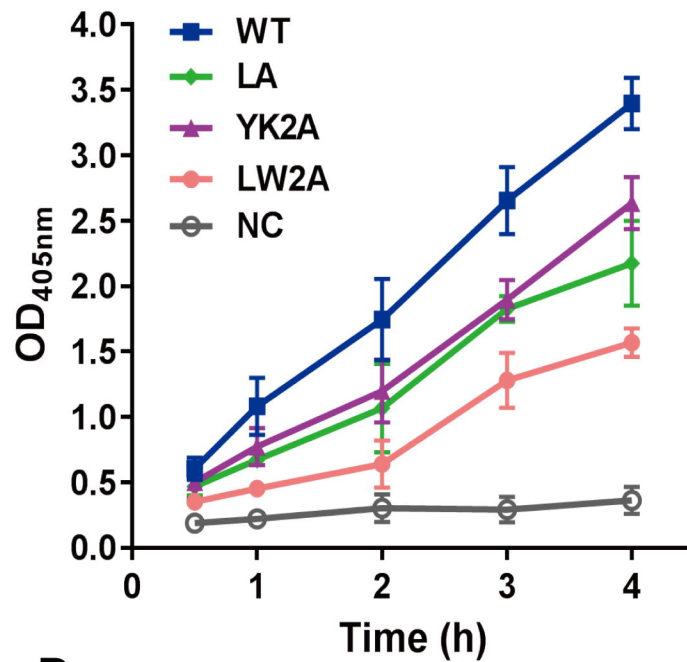**C**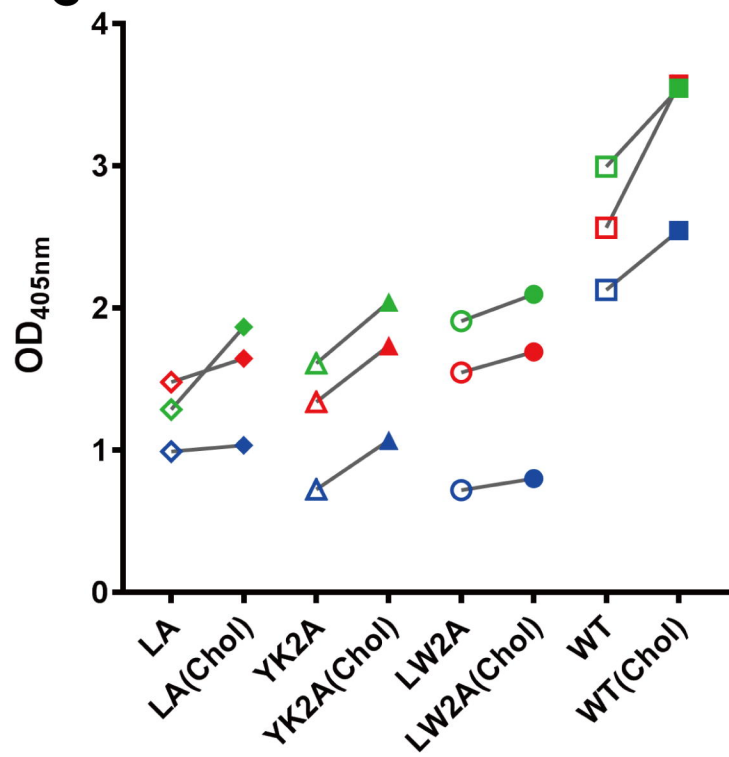**D**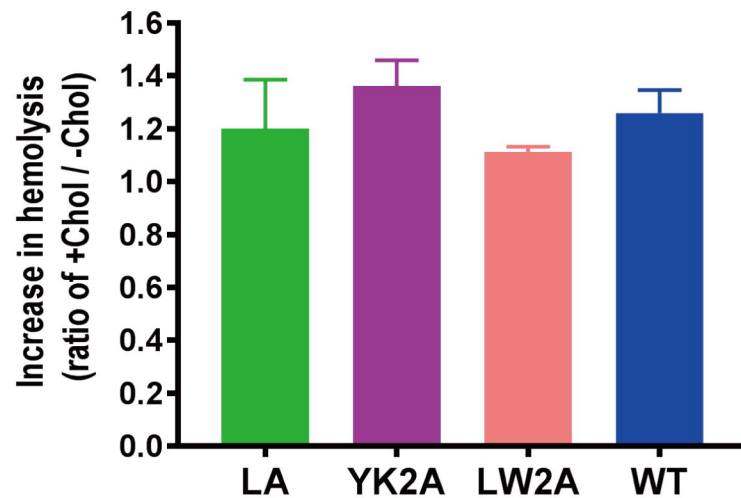

**A**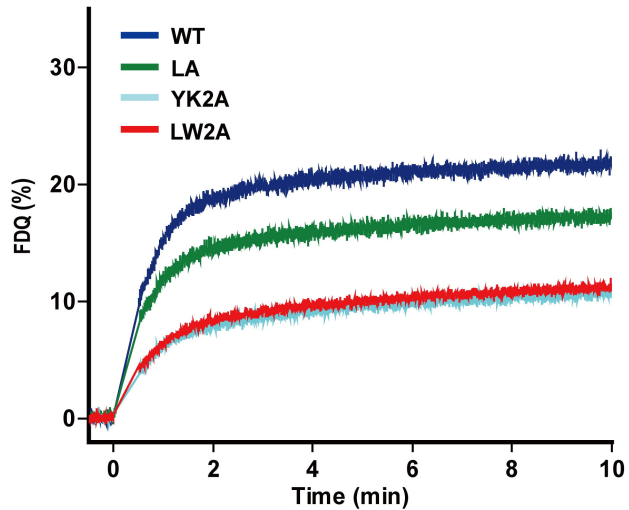**B**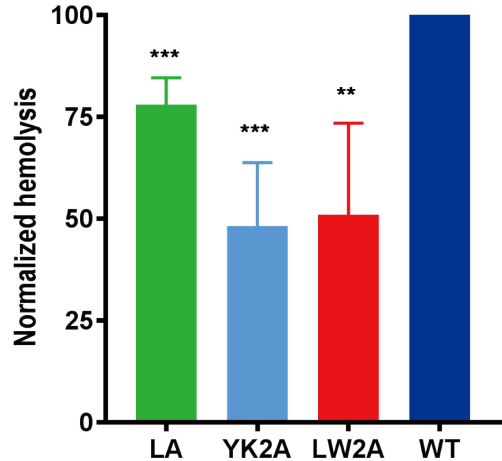

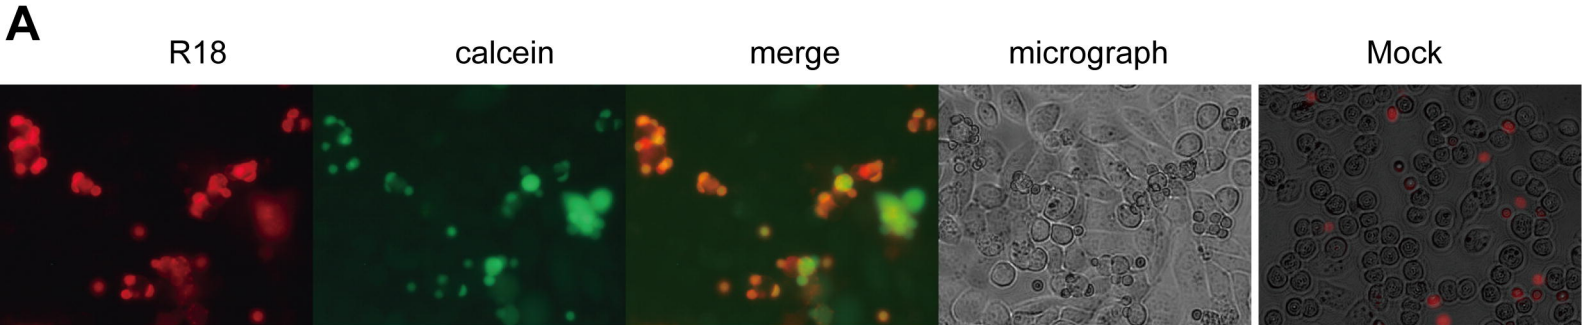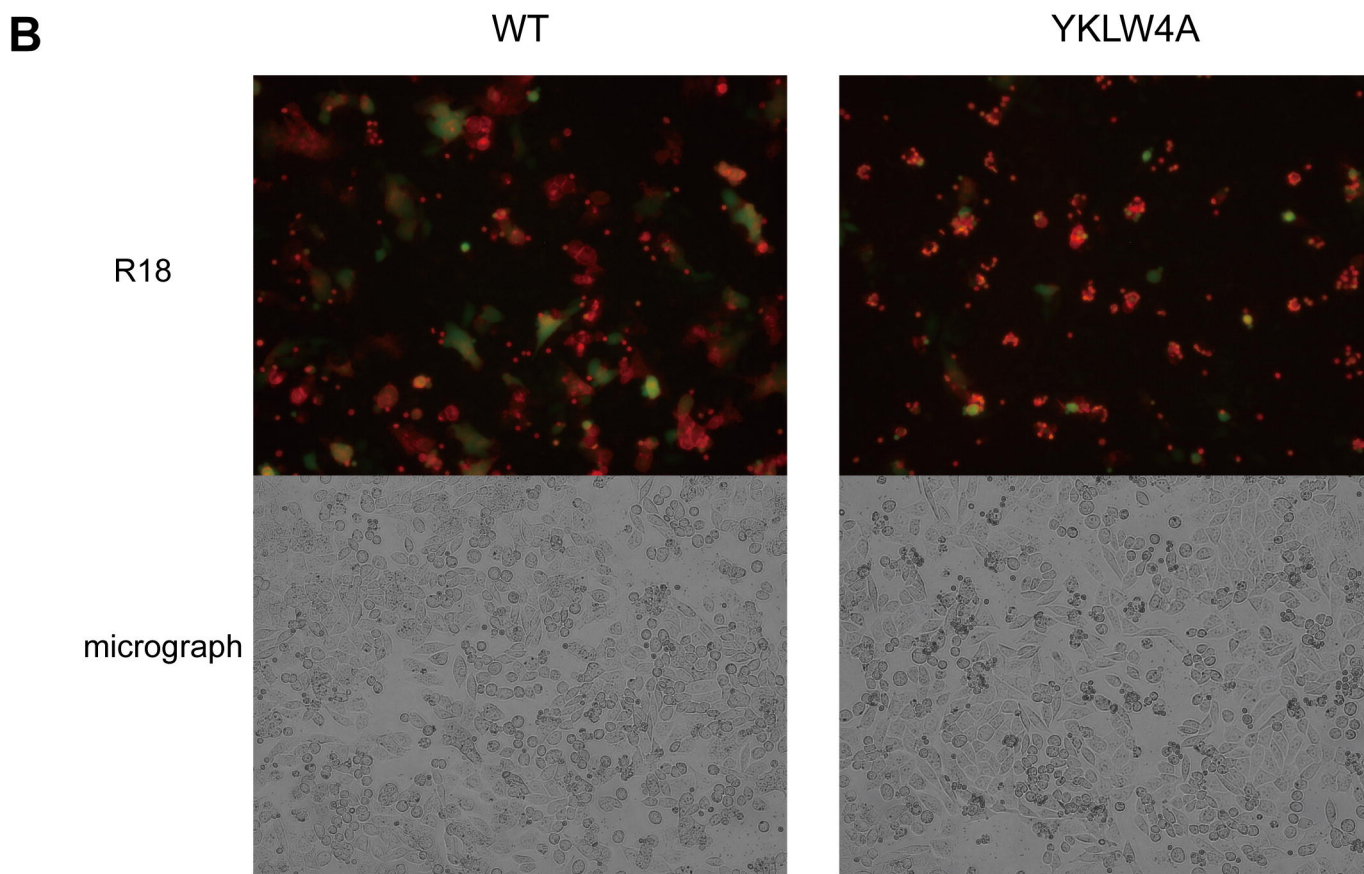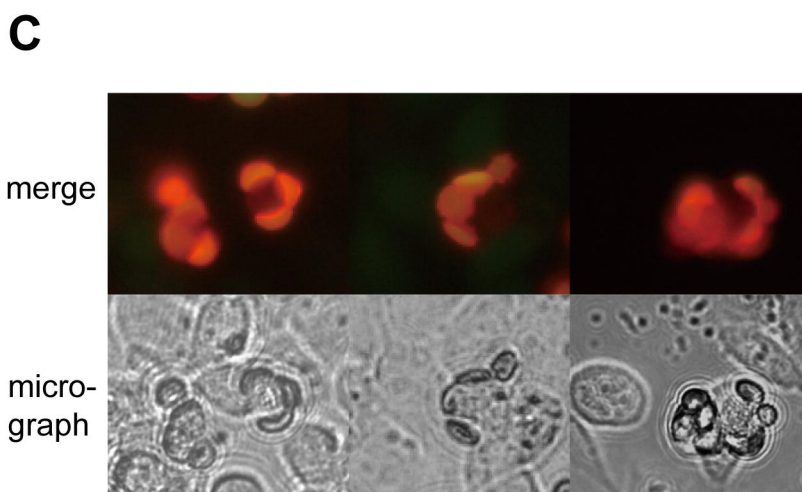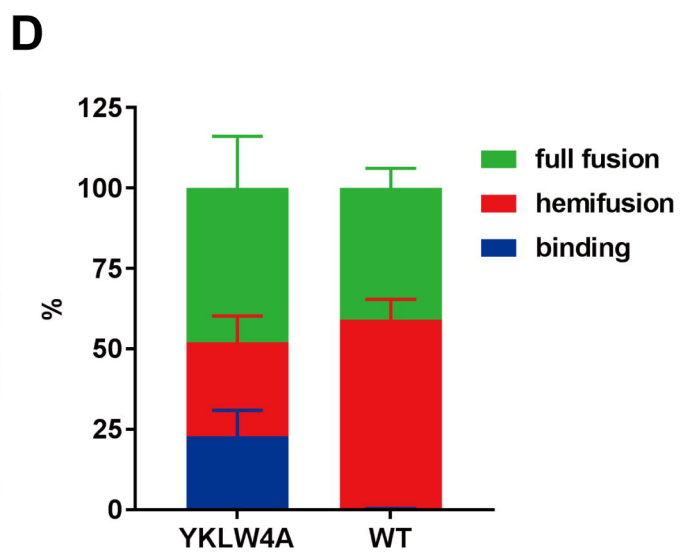

Source: https://www.biorxiv.org/content/10.1101/598953v1.full.pdf
